1    **RECIPROCALLY INHIBITORY CIRCUITS OPERATING WITH DISTINCT**  
2    **MECHANISMS ARE DIFFERENTLY ROBUST TO PERTURBATION AND**  
3    **MODULATION**

4

5    Ekaterina O. Morozova [morozova.e.o@gmail.com](mailto:morozova.e.o@gmail.com) <https://orcid.org/0000-0001-9131-7756>

6    Peter Newstein [pnewstein@uoregon.edu](mailto:pnewstein@uoregon.edu) <https://orcid.org/0000-0003-2966-783X>

7    Eve Marder [marder@brandeis.edu](mailto:marder@brandeis.edu) <http://orcid.org/0000-0001-9632-5448>

8

9    Volen Center and Department of Biology, Brandeis University, Waltham, MA, USA 02453

10

11

12    **Running title:** Robustness of reciprocally inhibitory circuits

13

## 14 **Highlights**

- 15 • The synaptic threshold determines the mode of reciprocal inhibitory circuits.
- 16 • Robust oscillatory escape mode circuits rely on tight conductance correlations.
- 17 • Release mode circuits are sensitive to temperature and neuromodulation.
- 18 • Mixed mode circuits are sensitive to neuronal excitability differences.

19

20

## 21 **Summary**

22 What features are important for circuit robustness? Reciprocal inhibition is a building  
23 block in many circuits. We used dynamic clamp to create reciprocally inhibitory circuits  
24 from GM neurons of the crab stomatogastric ganglion by injecting artificial synaptic and  
25 hyperpolarization-activated inward (H) currents. In “release”, the active neuron controls  
26 the off/on transitions. In “escape”, the inhibited neuron controls the transitions. We  
27 characterized the robustness of escape and release circuits to alterations in circuit  
28 parameters, temperature, and neuromodulation. Escape circuits rely on tight  
29 correlations between synaptic and H conductances to generate bursting but are resilient  
30 to temperature increase. Release circuits are robust to variations in synaptic and H  
31 conductances but fragile to temperature increase. The modulatory current ( $I_M$ ) restores  
32 oscillations in release circuits but has little effect in escape. Thus, the same perturbation  
33 can have dramatically different effects depending on the circuits’ mechanism of  
34 operation that may not be observable from circuit output.

35

36

37

38 **keywords:** half-center oscillator; mutual inhibition; oscillations; dynamic clamp; release;  
39 escape; temperature;  $I_M$

40

## 41 **Introduction**

42           Neuronal circuits show a high level of degeneracy in their intrinsic and synaptic  
43 properties, with multiple conductances with overlapping voltage and time dependence  
44 (Goaillard and Marder, 2021). Previous studies demonstrated that neuronal networks  
45 with similar underlying parameters that generate similar behavior can respond  
46 differently to perturbations (Alonso and Marder, 2020; Prinz et al., 2004; Tang et al.,  
47 2012). Reciprocal inhibition is ubiquitous in nervous systems, where it has many  
48 functions. Lateral inhibition is important in many sensory systems, and reciprocal  
49 inhibition between individual neurons or groups of neurons is the “building block” of  
50 many half-center oscillators that generate antiphase and multiphase activity patterns  
51 (Arbas and Calabrese, 1987a, b; Brown, 1911; Calabrese, 1998; Getting, 1989; Marder  
52 and Calabrese, 1996; Perkel and Mulloney, 1974; Sakurai and Katz, 2016; Satterlie,  
53 1985; Soffe et al., 2001; Zang et al., 2020). Due to their well-defined output, small  
54 reciprocally inhibitory circuits provide an excellent platform for investigating the  
55 resilience of circuits to internal and environmental challenges.

56           Theoretical studies have described two fundamentally different mechanisms of  
57 antiphase oscillations in half-center circuits: “release” and “escape” (Skinner et al.,  
58 1994; Wang and Rinzel, 1992). In the release mode the presynaptic cell falls below its  
59 synaptic threshold, thus, releasing the inhibited cell. In escape, the inhibited cell  
60 depolarizes above its synaptic threshold, thus, terminating the firing of the active cell.  
61 Whether the oscillator exhibits the escape or release mechanism depends on the  
62 position of the synaptic threshold within the slow-wave envelope of the membrane  
63 potential oscillation (Skinner et al., 1994; Wang and Rinzel, 1992). Many factors affect  
64 neuronal membrane potential and the synaptic threshold, including neuromodulators,  
65 temperature, and changes in the composition of the extracellular fluid.

66           Some of the theoretical predictions of how oscillations are generated and  
67 controlled in reciprocally inhibitory circuits were tested in biological neurons by Sharp et  
68 al. (1996) and Grashow et al (2009). They used the dynamic clamp, which utilizes a  
69 real-time computer interface to simulate nonlinear voltage-dependent synaptic and  
70 intrinsic currents in biological cells. Sharp et al. (1996) studied the effects of varying  
71 computer-generated parameters on the circuit output and confirmed theoretical

72 predictions that the switch in the mechanism of oscillations in a biological network is  
73 possible by shifting the synaptic threshold. Grashow et al. (2009) extended their work by  
74 studying the effects of the neuromodulators, oxotremorine and serotonin, on the  
75 dynamic clamp created half-center networks. They observed a substantial variability in  
76 individual circuit responses to neuromodulation.

77 Most theoretical studies on half-center oscillators were done with two identical  
78 neurons (Daun et al., 2009; Nadim et al., 1995; Skinner et al., 1994; Wang and Rinzel,  
79 1992; Zhang and Lewis, 2013) with the notable exception of Onasch and Gjorgieva  
80 (2020). In some biological systems, half-center oscillators are formed between pairs of  
81 neurons that are ostensibly “identical” or are copies of the same neuron type, such as,  
82 in the leech heartbeat system or sea slugs escape swimming central-pattern generators  
83 (CPGs) (Katz, 2016; Marder and Calabrese, 1996; Sakurai and Katz, 2016). That said,  
84 even when biological half-center oscillators are formed from the reciprocal inhibition of  
85 two neurons of the same cell type, there is always some variability between those  
86 neurons. Reciprocal inhibition between different classes of neurons can also be crucial  
87 for the operation of central pattern generating or other circuits, such as in the  
88 stomatogastric ganglion (Bartos et al., 1999; Blitz and Nusbaum, 2011; Marder and  
89 Bucher, 2007; Marder and Calabrese, 1996). In this case, there is no presumption that  
90 the intrinsic properties of the two neurons are identical. In this paper we exploit the  
91 biological variability between the neurons we study to examine the robustness of the  
92 half-center oscillator on the extent of asymmetry between the two neurons used to form  
93 the half-center.

94 Although it is known that half-center oscillators can operate with a mixed  
95 mechanism (Angstadt and Calabrese, 1989, 1991; Calabrese et al., 2016; Hill et al.,  
96 2001), these have been less studied than oscillators in the pure release or pure escape  
97 mechanisms. Here, we also look at the increased or decreased resilience of oscillators  
98 operating in a mixed regime, as modulation and other perturbations often lead to half-  
99 centers operating in a mixture of mechanisms.

100 We performed dynamic clamp experiments of half-center oscillators using  
101 temperature and neuromodulation as perturbations to address some of the following  
102 questions. Are circuits with different underlying mechanisms of oscillation equally robust

103 to intrinsic and environmental perturbations? What are the factors that play a key role in  
104 immediate circuit resilience against perturbations? What role does the dynamical  
105 mechanism of oscillation play in the circuit responses to neuromodulation? How does  
106 asymmetry between the units forming a half-center oscillator affect the output of the  
107 circuit?  
108  
109

110 **Results**

111 **The output of reciprocally inhibitory neurons is shaped by their intrinsic and**  
 112 **synaptic properties**

113 To explore the interactions between intrinsic and synaptic parameters underlying  
 114 variability in circuit behaviors and differential robustness to perturbations, we used the  
 115 dynamic clamp to build half-center oscillator circuits using pharmacologically isolated  
 116 gastric mill (GM) neurons of the stomatogastric ganglion (STG) of the crab *Cancer*  
 117 *borealis* (Figure 1A, STAR Methods). Half-center circuits were formed by connecting  
 118 two neurons via artificial reciprocal inhibitory synapses and by adding hyperpolarization-  
 119 activated inward (H) currents, following the methods described in Sharp et al. (1996).  
 120 Activation curves for the synaptic and H currents are shown in Figure 1B.

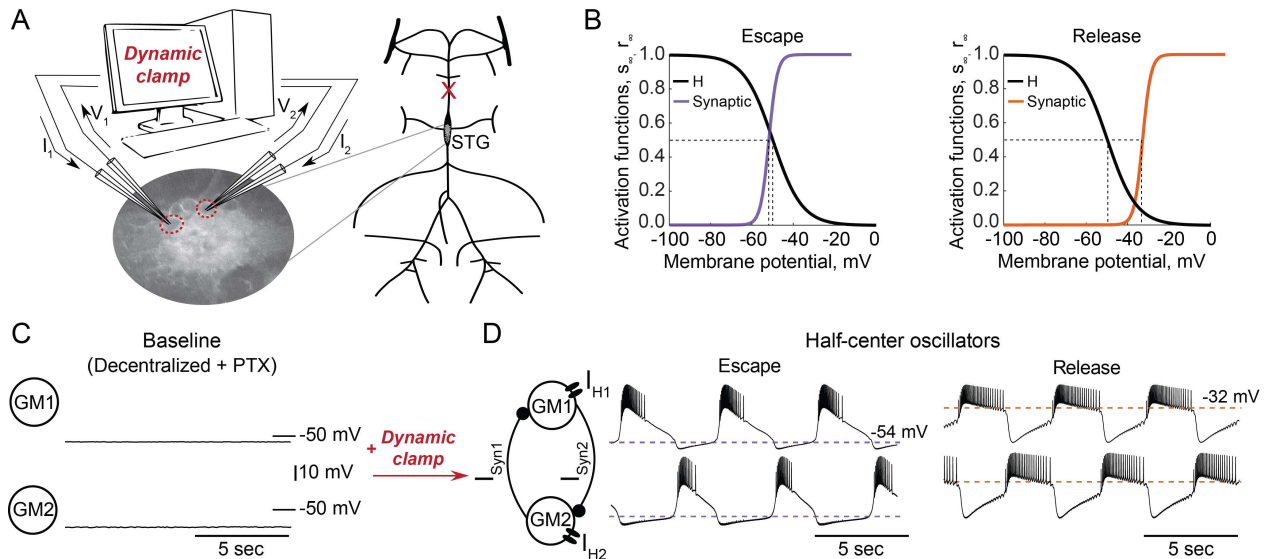

121  
 122 **Figure 1. Experimental set-up. A)** Half-center oscillator circuits are built by connecting two  
 123 gastric mill (GM) neurons from the stomatogastric ganglion (STG) of the crab *Cancer borealis*  
 124 via artificial reciprocal inhibitory synapses ( $I_{syn}$ ) and by adding an artificial hyperpolarization-  
 125 activated inward current ( $I_H$ ) in two-electrode dynamic-clamp mode using RTXI. **B)** Activation  
 126 curves of the dynamic clamp generated H current and synaptic current. Shift in the synaptic  
 127 activation curve switches the mechanism of oscillations between escape (left graph, purple  
 128 curve) and release (right graph, orange curve). **C)** At baseline, synaptically isolated GM neurons  
 129 are silent with a resting membrane potential between -65 and -55 mV. **D)** When coupled via the  
 130 dynamic clamp, neurons generate alternating bursting pattern of activity (half-center oscillator).  
 131 Representative half-center oscillator traces with escape mechanism are shown on the left and  
 132 with release mechanism on the right. Synaptic thresholds are indicated by the horizontal dashed  
 133 lines. In the circuit diagram, filled circles indicate inhibitory synapses.

134

135 GM neurons are silent in the absence of modulatory and synaptic inputs (Figure  
136 1C) and fire tonically when depolarized. When coupled together via reciprocal inhibitory  
137 connections they can generate an antiphase bursting patterns of activity (Figure 1D).  
138 There are two fundamental mechanisms of antiphase bursting in these circuits –  
139 “release” and “escape” (Wang and Rinzel, 1992; (Skinner et al., 1994). The mechanism  
140 of oscillation depends on the position of the synaptic threshold within the slow-wave  
141 envelope of the membrane potential oscillations. Low thresholds that are close to the  
142 most hyperpolarized portion of the slow-wave generate an escape mechanism, while  
143 high synaptic thresholds that are close to the top of the slow-wave envelope lead to a  
144 release mechanism (Figure 1D). By shifting the synaptic activation curve via dynamic  
145 clamp, we change the mechanism of oscillation (Figure 1B).

#### 146 ***Characteristics of half-center oscillator output depend on the mechanism of*** 147 ***oscillation***

148 We investigated the dependence of the output of half-center oscillator circuits on  
149 the synaptic threshold while fixing the synaptic and H conductances. In each experiment  
150 we varied the synaptic threshold from -54 to -28 mV in 2 mV steps (N=16, Figure 2A).  
151 We then characterized how physiologically relevant properties of the circuit output, e.g.,  
152 the cycle frequency, amplitude of oscillations, duty cycle, spike frequency and number  
153 of spikes per burst depend on the synaptic threshold (Figure 2B). Because of the  
154 inherent intrinsic differences in the biological neurons that comprise the half-centers, the  
155 same value of synaptic threshold does not necessarily generate the same mechanism  
156 of oscillation across preparations, as the relative position of the threshold within the  
157 slow-wave and the excitability of the neurons define the mechanism of oscillation. Thus,  
158 to quantitatively characterize the mechanism of oscillation across preparations, we  
159 introduce a measure of the mechanism of oscillation called Escape to Release Quotient  
160 (ERQ). This allowed us to characterize the mechanism of oscillation in response to  
161 perturbations or changes in circuit parameters. We defined ERQ with the following  
162 equation:

$$163 \quad ERQ = \frac{\overline{V_M} - V_{th}}{\overline{V_M}}.$$

164  $\overline{V_M}$  is a mean membrane potential averaged across both neurons in a circuit and  $V_{th}$  is a  
 165 synaptic threshold.

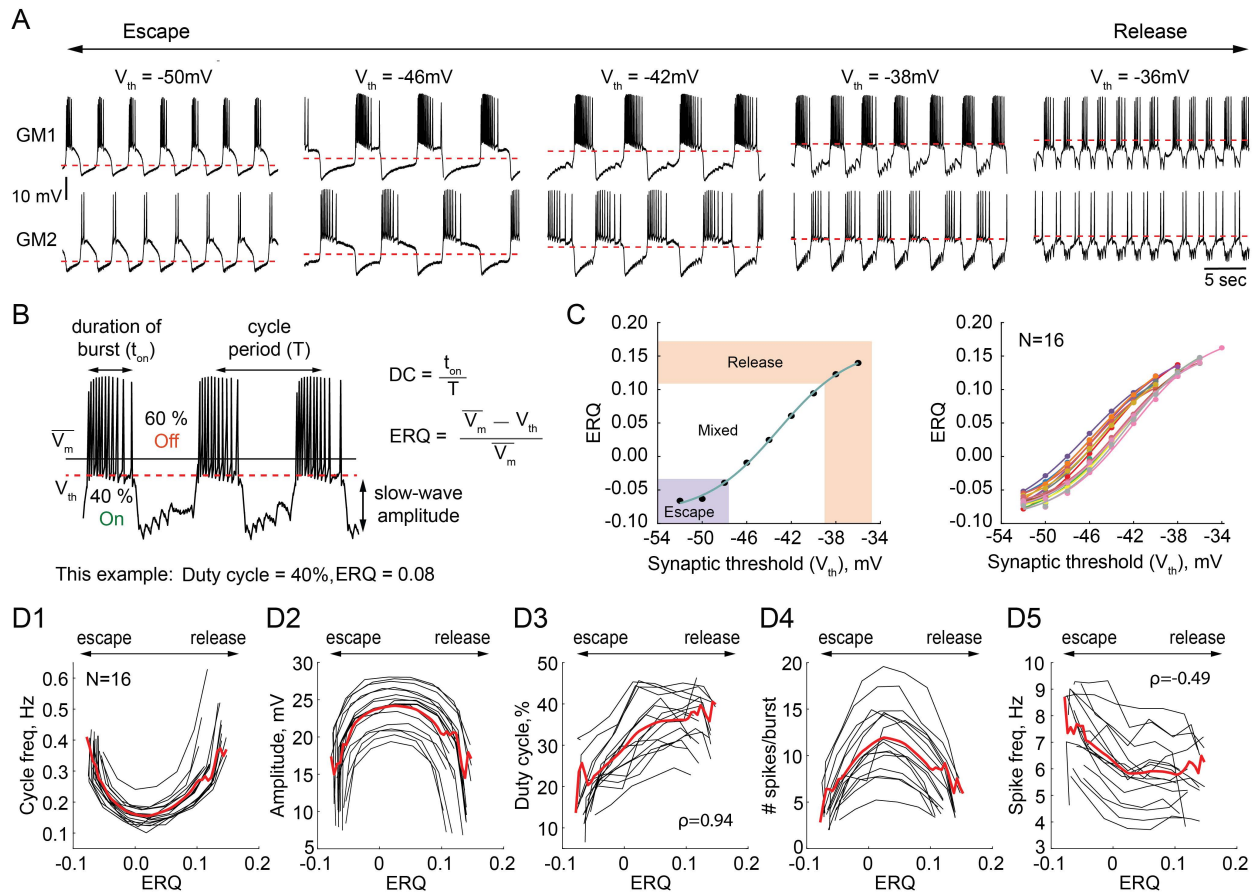

166

167 **Figure 2. Dependence of the characteristics of half-center oscillator output on the**  
 168 **mechanism of oscillation. A)** Representative intracellular recordings of GM neurons coupled  
 169 via the dynamic clamp to form a half-center oscillator for different synaptic thresholds ( $V_{th}$ ).  
 170 Depolarization of the synaptic threshold switches the mechanism of oscillations from escape to  
 171 release passing through a mixture of mechanisms. **B)** Half-center oscillator activity  
 172 characteristics measured in this study, such as cycle period (frequency), slow-wave amplitude  
 173 and duty cycle (DC) are indicated on the example GM neuron trace. Escape to Release  
 174 Quotient (ERQ) is calculated based on the mean membrane potential and the synaptic  
 175 threshold as shown. **C)** ERQ as a function of the synaptic threshold for a single preparation (left)  
 176 and multiple preparations (N=16, right). Relationship between the ERQ and the synaptic  
 177 threshold is sigmoidal as shown by the fit curve (cyan). Left hand ERQ plot is from the  
 178 experiment shown in (A) **D1)** Cycle frequency vs ERQ. **D2)** Slow-wave amplitude vs ERQ.  
 179 **D3)** Duty cycle vs ERQ. **D4)** Number of spikes per burst vs ERQ. **D5)** Spike frequency vs ERQ.  
 180 Black lines are individual experiments (N=16), red lines represent means across all the  
 181 experiments.

182

183

184

The left panel of Figure 2C shows that the relationship between the synaptic  
 threshold and ERQ is well fit by a sigmoidal function ( $R^2 = 0.998$ ). At the top of the  
 sigmoid (above 0.11 in Figure 2C) the circuits are in a release mechanism. At the



185 bottom of the sigmoid (below -0.033 in Figure 2C) the circuits are in an escape  
186 mechanism. The threshold ERQ values for release and escape were defined based on  
187 the maximum and minimum of the second derivative of the sigmoid functions that were  
188 fit to ERQ vs  $V_{th}$  data for each experiment. The ERQ threshold for escape is  $-0.038 \pm$   
189  $0.008$ , while the ERQ threshold for release is  $0.105 \pm 0.012$ . The near-linear portion of  
190 the sigmoidal curve corresponds to a mixture of the mechanisms. The mixed regime  
191 demonstrates characteristics of both mechanisms with various balances between the  
192 mechanisms depending on the relative position of the threshold within the slow-wave  
193 envelope. The right panel in Figure 2C shows the dependence of the ERQ on the  
194 synaptic threshold across 16 preparations.

195 The cycle frequency shows a U-shaped relation as a function of the ERQ (Figure  
196 2D1), as also seen in Sharp et al (1996). The slow-wave amplitude shows an inverted  
197 U-shaped dependence on the ERQ and is inversely correlated with the cycle frequency  
198 (Figure 2D2, Pearson correlation coefficient  $r = -0.9$ ). The duty cycle (the burst  
199 duration divided by the cycle period) increases as the mechanism of oscillations  
200 changes from escape to release (Figure 2D3,  $\rho = 0.94, p < 0.001$ , Spearman rank  
201 correlation test). The difference in the duty cycle of circuits with different mechanisms  
202 can be explained by the difference in the magnitudes of the synaptic current. Because  
203 the synaptic threshold in escape is significantly more hyperpolarized relative to the  
204 release case, the magnitude of the synaptic current in a postsynaptic cell during its  
205 active phase is larger in the escape mechanism than in release, causing a steep  
206 hyperpolarization of the membrane potential below the neuron's spike threshold. The  
207 number of spikes per burst also shows an inverted U-shaped dependence on ERQ  
208 (Figure 2D4). The spike frequency moderately decreases as the mechanism of  
209 oscillation changes from escape to release (Figure 2D5,  $\rho = -0.49, p = 3.6 \cdot 10^{-4}$ ,  
210 Spearman rank correlation test). The higher spike frequency in escape mode is caused  
211 by a strong rebound current.

### 212 ***Circuit output as a function of synaptic and H conductances in escape vs release***

213 We investigated the dependence of the output of reciprocally inhibitory circuits on  
214 their synaptic ( $g_{syn}$ ) and H ( $g_H$ ) conductances. In each experiment we varied  $g_{syn}$  and  $g_H$   
215 from 150 nS to 1050 nS in steps, mapping combinations of these parameters to

216 characteristics of the output of the circuits operating with escape or release  
217 mechanisms. Figure 3 summarizes pooled data from 20 experiments. Circuits operating  
218 in either release or escape produce stable alternating bursting which is distributed  
219 differently in the synaptic and H conductance space (Figure 3A). The gray scale in  
220 Figure 3A shows the fraction of bursting circuits operating with escape (left panel, N=10)  
221 and release (right panel, N=10) mechanisms at each  $g_H$ - $g_{syn}$  parameter set. There are  
222 more circuits that generate half-center activity in release than in escape across these  
223 parameters. The synaptic and H currents must be tightly correlated to produce robust  
224 bursting in escape, but not in release mode. These findings suggest that half-center  
225 oscillators with a release mechanism are more robust to changes in either synaptic or H  
226 conductances, compared to half-centers with an escape mechanism. In addition, these  
227 results provide a potential explanation of the across-preparation variability in  
228 conductance sets leading to stable bursting in reciprocally inhibitory circuits with a fixed  
229 synaptic threshold observed by Grashow et al. (2009).

230 Figure 3B-F characterizes the dependence of cycle frequency, oscillation  
231 amplitude, duty cycle, spike frequency and the number of spikes per burst on synaptic  
232 and H conductances. Increase in H current decreases the cycle frequency of the circuits  
233 in release (Figure 3B, right panel), but increases the cycle frequency in escape (Figure  
234 3B, left panel). In escape, increasing the H conductance helps the inhibited neuron  
235 depolarize above the synaptic threshold faster, thus increasing the oscillation frequency.  
236 In release, increasing the H conductance prolongs the active phase of an uninhibited  
237 neuron, thus decreasing the frequency of oscillation. In both cases the oscillation  
238 frequency decreases with the increase in inhibitory synaptic conductance (Figure 3B).  
239 The slow-wave amplitude (Figure 3C), number of spikes per burst (Figure 3D) and spike  
240 frequency (Figure 3E) decrease in the escape circuits but increase in the release  
241 circuits when H conductance is increased. The duty cycle is relatively independent of  
242 variations in synaptic and H conductances in either release or escape cases (Figure  
243 3F). For all sets of  $g_{syn}$  and  $g_H$ , the duty cycles of the escape half-center oscillators are  
244 significantly lower than the duty cycles of the release half-center oscillators ( $19.5 \pm 3.6\%$   
245 in escape vs  $42.4 \pm 3.3\%$  in release,  $p < 0.001$ , Wilcoxon rank-sum test).

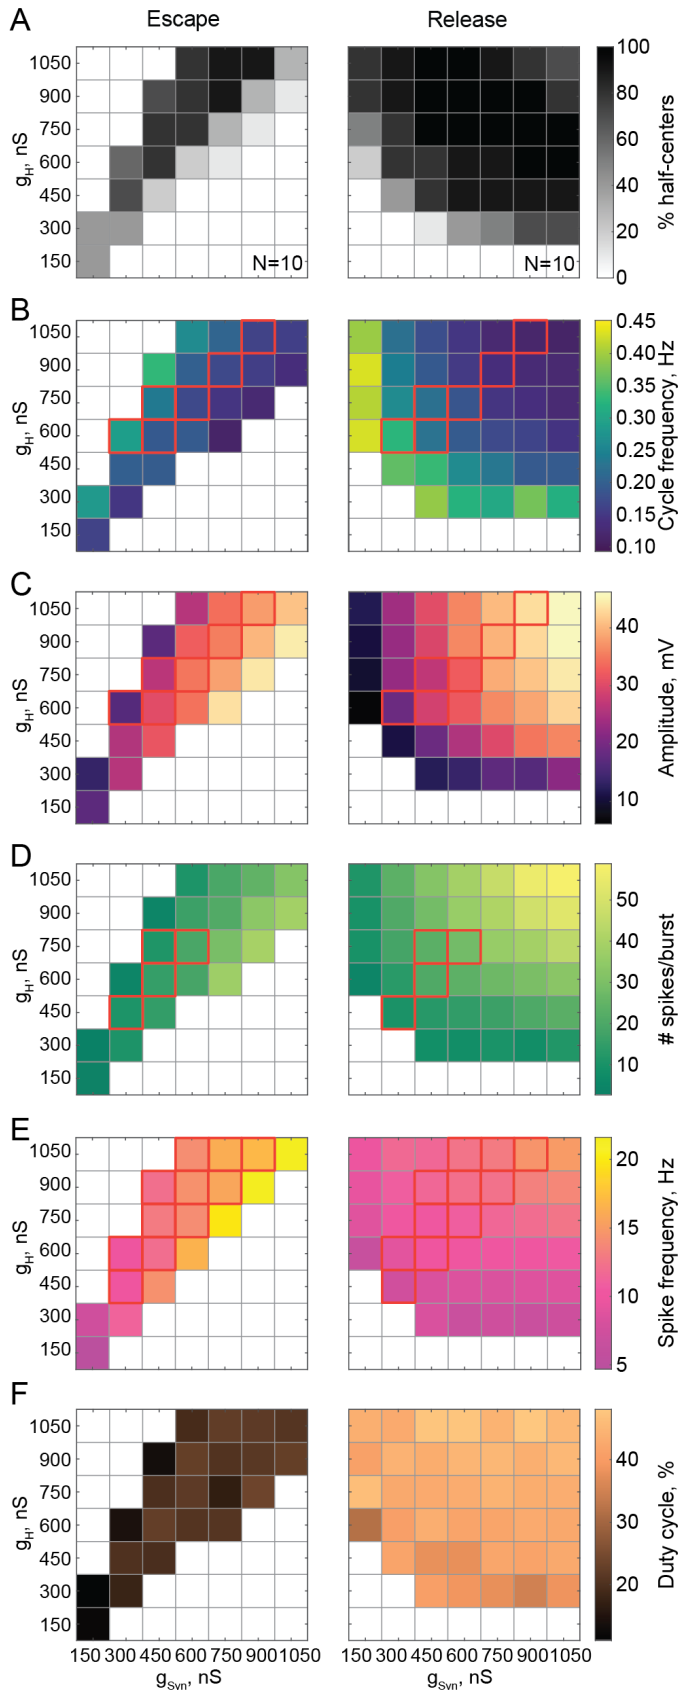

**Figure 3. Maps of network output as a function of the synaptic and H conductances ( $g_{Syn}$ ,  $g_H$ ) for circuits with escape and release mechanisms.**

**A**) Distribution of half-center oscillators in  $g_{Syn}$ - $g_H$  parameter space. Gray scale shows the percentage of preparations that formed half-center oscillators for each  $g_{Syn}$ - $g_H$  parameter combination with the map (N=10 for each mechanism). White space corresponds to parameters sets for which no oscillators exist.

**B**) Dependence of the mean half-center oscillator cycle frequency on  $g_{Syn}$  and  $g_H$  across 10 preparations for each mechanism.

**C**) Dependence of the mean slow-wave amplitude on  $g_{Syn}$  and  $g_H$ .

**D**) Dependence of the mean number of spikes per burst on  $g_{Syn}$  and  $g_H$ .

**E**) Dependence of the mean spike frequency on  $g_{Syn}$  and  $g_H$ .

**F**) Dependence of the mean duty cycle on  $g_{Syn}$  and  $g_H$ .

In panels B-E,  $g_{Syn}$ - $g_H$  parameter sets for which circuit output characteristics were not significantly different between release and escape are indicated by red boxes (Wilcoxon rank-sum test,  $p > 0.05$ ).

246 For a range of  $g_H$ - $g_{Syn}$  parameter sets, the characteristics of the output of half-  
247 center oscillators with escape and release mechanisms are not statistically different  
248 (Figure 3 B-E, indicated by the red boxes, Wilcoxon rank-sum test,  $p > 0.05$ ). Thus,  
249 similar circuit function can be produced by both escape and release mechanisms for the  
250 same values of synaptic and H conductances, although the duty cycles are more  
251 disparate than other measures of circuit performance. Importantly, if the mechanism is  
252 not known *a priori*, it is practically impossible to identify it only based on baseline spike  
253 output (e.g. in extracellular recordings) without perturbing the system.

### 254 ***Circuits operating in a mixture of mechanisms***

255 In some biological systems, half-center oscillators rely on a mixture of escape  
256 and release mechanisms to generate alternating bursting patterns of activity (Angstadt  
257 and Calabrese, 1989, 1991; Calabrese et al., 2016; Hill et al., 2001). Neuromodulators  
258 can shift the synaptic threshold, thus affecting the mechanism of oscillation in the circuit  
259 (Li et al., 2018). We explored how the characteristics of the circuit output mapped onto  
260  $g_{Syn}$ - $g_H$  parameter space changed as we transitioned through mechanisms by changing  
261 the synaptic threshold. Figure 4 shows the transformation of the  $g_{Syn}$ - $g_H$  maps of the  
262 network outputs by moving the synaptic threshold from -50 mV to -30 mV in 5 mV steps.  
263 The mechanism of oscillation is relatively independent of  $g_{Syn}$  and  $g_H$  for the extreme  
264 cases of the hyperpolarized synaptic thresholds generating an escape mechanism  
265 (Figure 4C left panel) and depolarized synaptic thresholds generating a release  
266 mechanism (Figure 4C right panel). Nonetheless, the mechanism is sensitive to the  
267 changes  $g_{Syn}$  and  $g_H$  for the intermediate values of the synaptic threshold, as evident by  
268 the substantial change in ERQ with  $g_{Syn}$  and  $g_H$  (Figure 4A, 4C middle panels).

269 Figure 4A depicts the ERQ and representative half-center voltage traces as a  
270 function of  $g_{Syn}$  and  $g_H$  with a synaptic threshold of -40mV. This network is in a mixture  
271 of escape and release. The left-hand map illustrates a smooth transition in the  
272 mechanism of oscillation as a function of changes in  $g_{Syn}$  and  $g_H$ . The  
273 electrophysiological traces to the right illustrate the activity patterns at different map  
274 locations (Figure 4B). Increasing  $g_H$  and decreasing  $g_{Syn}$  biases the balance towards  
275 escape, while decreasing  $g_H$  and increasing  $g_{Syn}$  biases the mechanism towards

276 release. Changing the mechanism of oscillation ultimately influences how the circuit will  
 277 respond to stimuli and perturbations.

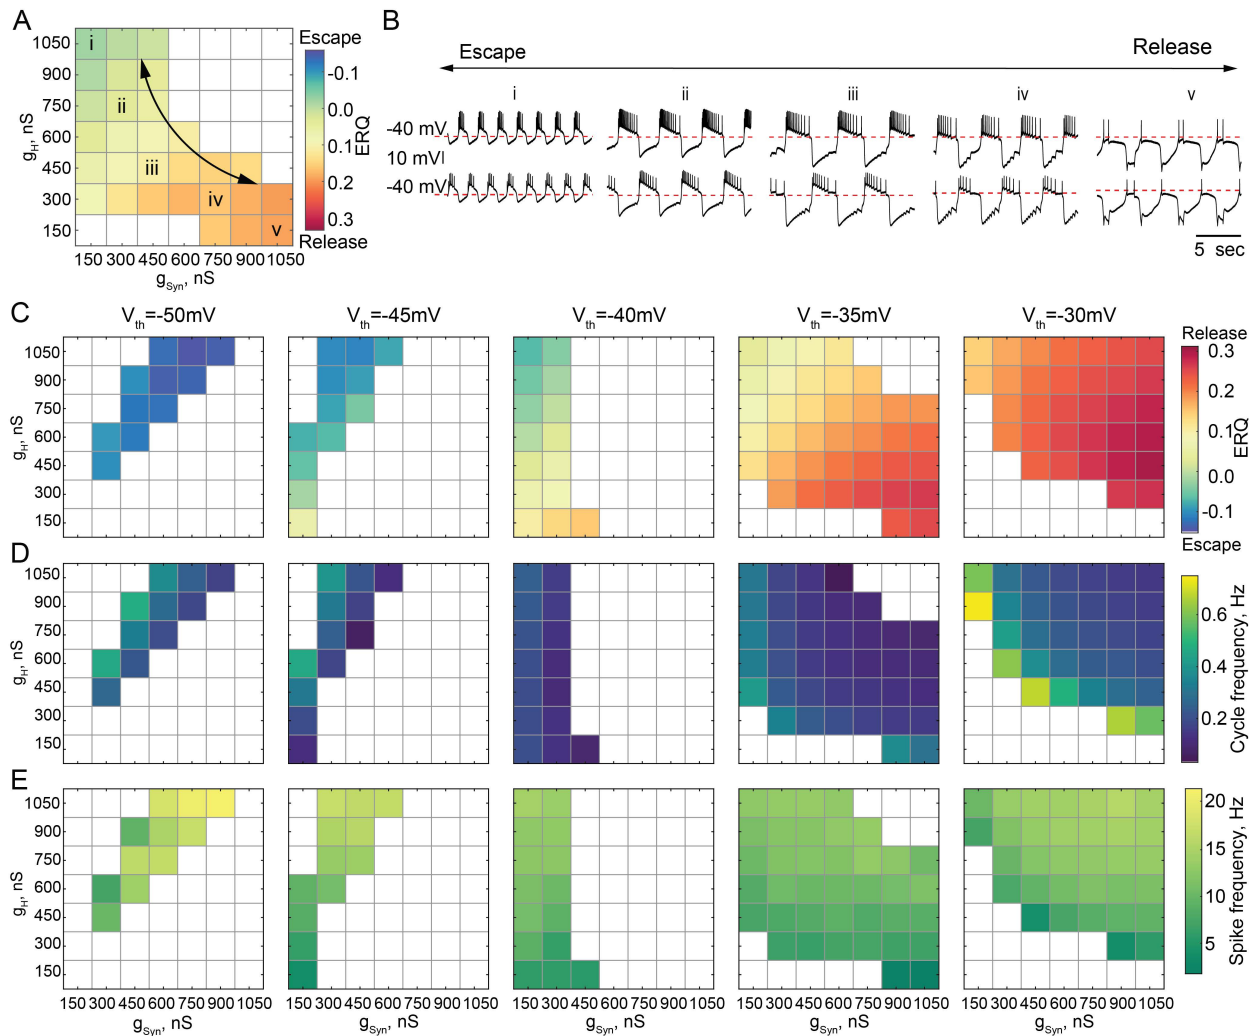

278

279 **Figure 4. Dependence of the oscillation mechanism and other half-center activity**  
 280 **characteristics on the synaptic and H conductances for different synaptic thresholds.**  
 281 **A)** ERQ as a function of synaptic and H conductances with a synaptic threshold of  $-40$  mV in a  
 282 single preparation. Mechanism of oscillations is sensitive to the changes in synaptic and H  
 283 conductances at  $V_{th} = -40$  mV: an increase in  $g_{syn}$  together with a decrease in  $g_H$  switches the  
 284 mechanism of oscillation from escape (top left corner in the map) to release (bottom right corner  
 285 in the map). **B)** Representative intracellular recordings of GM neurons coupled via the dynamic  
 286 clamp corresponding to values of  $g_{syn}$  and  $g_H$  indicated in the parameter map (A) by roman  
 287 numerals. **C)** Dependence of ERQ on  $g_{syn}$  and  $g_H$  for the synaptic thresholds of  $-50$  mV,  $-45$  mV,  
 288  $-40$  mV,  $-35$  mV and  $-30$  mV in a single preparation. ERQ is relatively insensitive to changes in  
 289  $g_{syn}$  and  $g_H$  in pure escape (left map) and pure release (right map) cases, but sensitive to  $g_{syn}$   
 290 and  $g_H$  for intermediate thresholds (middle maps) similar to the experiment shown in panel (A).  
 291 **D)** Dependence of the half-center oscillator cycle frequency on  $g_{syn}$  and  $g_H$  for different synaptic  
 292 thresholds. **E)** Dependence of the spike frequency on  $g_{syn}$  and  $g_H$  for different synaptic  
 293 thresholds.

294

295           Theoretical studies have found that stable bursting is produced when the  
296 synaptic threshold is within the slow wave envelope of the membrane potential  
297 oscillations (Skinner et al., 1994). Thus, it might appear to be beneficial for the circuit to  
298 rely on a mixture of mechanisms, as then the synaptic threshold is far from both the top  
299 and bottom of the slow wave. However, we observed that for the intermediate values of  
300 the synaptic thresholds ( $V_{th}=-45, 40$  mV, middle maps in Figure 4C), bursting is less  
301 regular and exists for a small set of  $g_{Syn}-g_H$  on the edge of the map, corresponding to  
302 weak synaptic coupling. This is because biological neurons, even of the same type, are  
303 never perfectly identical with respect to their intrinsic properties. Thus, the balance  
304 between the mechanisms is slightly different in the two cells, leading to situations when  
305 one of the cells does not have enough depolarizing drive to escape from inhibition, thus  
306 preventing the transition between the states from occurring. Only a small subset of  $g_{Syn}-$   
307  $g_H$  parameters allows for a smooth transition from one mechanism to another without  
308 losing alternating activity.

309           We characterized the dependence of cycle frequency, spike frequency, slow-  
310 wave amplitude, number of spikes per burst and duty cycle on synaptic and H  
311 conductances for different values of synaptic thresholds (Figure 4 and S1). For the  
312 synaptic threshold of  $-40$  mV, the cycle frequency is independent of the change in H  
313 conductance (Figure 4D middle panel). The spike frequency increases with the increase  
314 in both  $g_{Syn}-g_H$  for all the values of the synaptic thresholds (Figure 4E).

315           Besides the alternating bursting pattern of activity, reciprocally inhibitory circuits  
316 can produce a rich array of other outputs, depending on the underlying parameters.  
317 Thus, we classified the activity patterns of reciprocally inhibitory circuits as either silent,  
318 asymmetric, irregular spiking, antiphase bursting or antiphase spiking for each set of  
319  $g_{Syn}-g_H$  and each value of the synaptic threshold (Figure S1, see STAR methods for the  
320 description of the classification algorithm). In the case of the escape mechanism, the  
321 circuits are typically silent or asymmetric for the parameter sets off the diagonal in the  
322 map (Figure S1 A left panels). In contrast, in the case of release, the circuits typically  
323 show either antiphase or irregular spiking pattern of activity for low values of  $g_{Syn}$  and  
324  $g_H$ , on the border with antiphase bursting (Figure S1 A right panel). For high values of  
325  $g_{Syn}$  and  $g_H$ , the circuit either shows antiphase bursting or asymmetric spiking (Figure S1

326 A, right panels), with one neuron constantly inhibiting the other one, depending on the  
327 asymmetry of neuronal intrinsic properties. The number of networks showing  
328 asymmetric firing pattern of activity is dominant on the  $g_{\text{Syn}}-g_{\text{H}}$  map with the intermediate  
329 value of the synaptic threshold ( $V_{\text{th}}=-40$  mV), uncovering the differences in the  
330 excitability properties of the half-center neurons (Figure S1 middle panel). This analysis  
331 allows us to predict how the activity pattern of reciprocally inhibitory circuits will change  
332 with the change of synaptic and H conductances, depending on the mechanism of  
333 oscillation.

### 334 ***Effect of temperature on half-center oscillator circuits with temperature-*** 335 ***independent synaptic and H currents***

336 Rhythmic circuits, especially central pattern generators, must be robust to a wide  
337 range of global perturbations. Temperature is a natural and nontrivial perturbation that  
338 affects all biological processes to various degrees. We assessed the response of  
339 reciprocally inhibitory circuits relying on different mechanisms of oscillation to  
340 temperature changes. The dynamic clamp allowed us to study temperature-induced  
341 changes in the circuit output while isolating the effects of temperature on the synaptic  
342 and H currents from its effects on the cell-intrinsic currents. We built half-center  
343 oscillators with escape and release mechanisms and increased temperature in a  
344 smooth ramp from 10°C to 20°C (Figure 5A: release, 5B: escape). These temperatures  
345 were chosen based on the temperatures that *C. borealis* naturally experiences in the  
346 wild. In this first sets of experiments, we intentionally kept the artificial synaptic and H  
347 currents temperature-independent to explore the role of temperature-induced changes  
348 in the intrinsic properties of the cells on the circuit output.

349 Reciprocally inhibitory circuits with a release mechanism become less robust as  
350 the temperature increases, as evident by a significant reduction in the slow-wave  
351 amplitude and increase in irregularity in the cycle frequency (Figure 5A). 9/15 release  
352 circuits lost oscillations when the temperature was increased by 10°C. The cycle  
353 frequency of these circuits significantly increases with an increase in temperature  
354 despite no changes in the properties of synaptic or H currents (Figure 5A4,A5 ). On the  
355 other hand, circuits with an escape mechanism are extremely robust to an increase in  
356 temperature (Figure 5B). The cycle frequency of these circuits is remarkably stable

357 during the changes in temperature (Figure 5B4,B5).

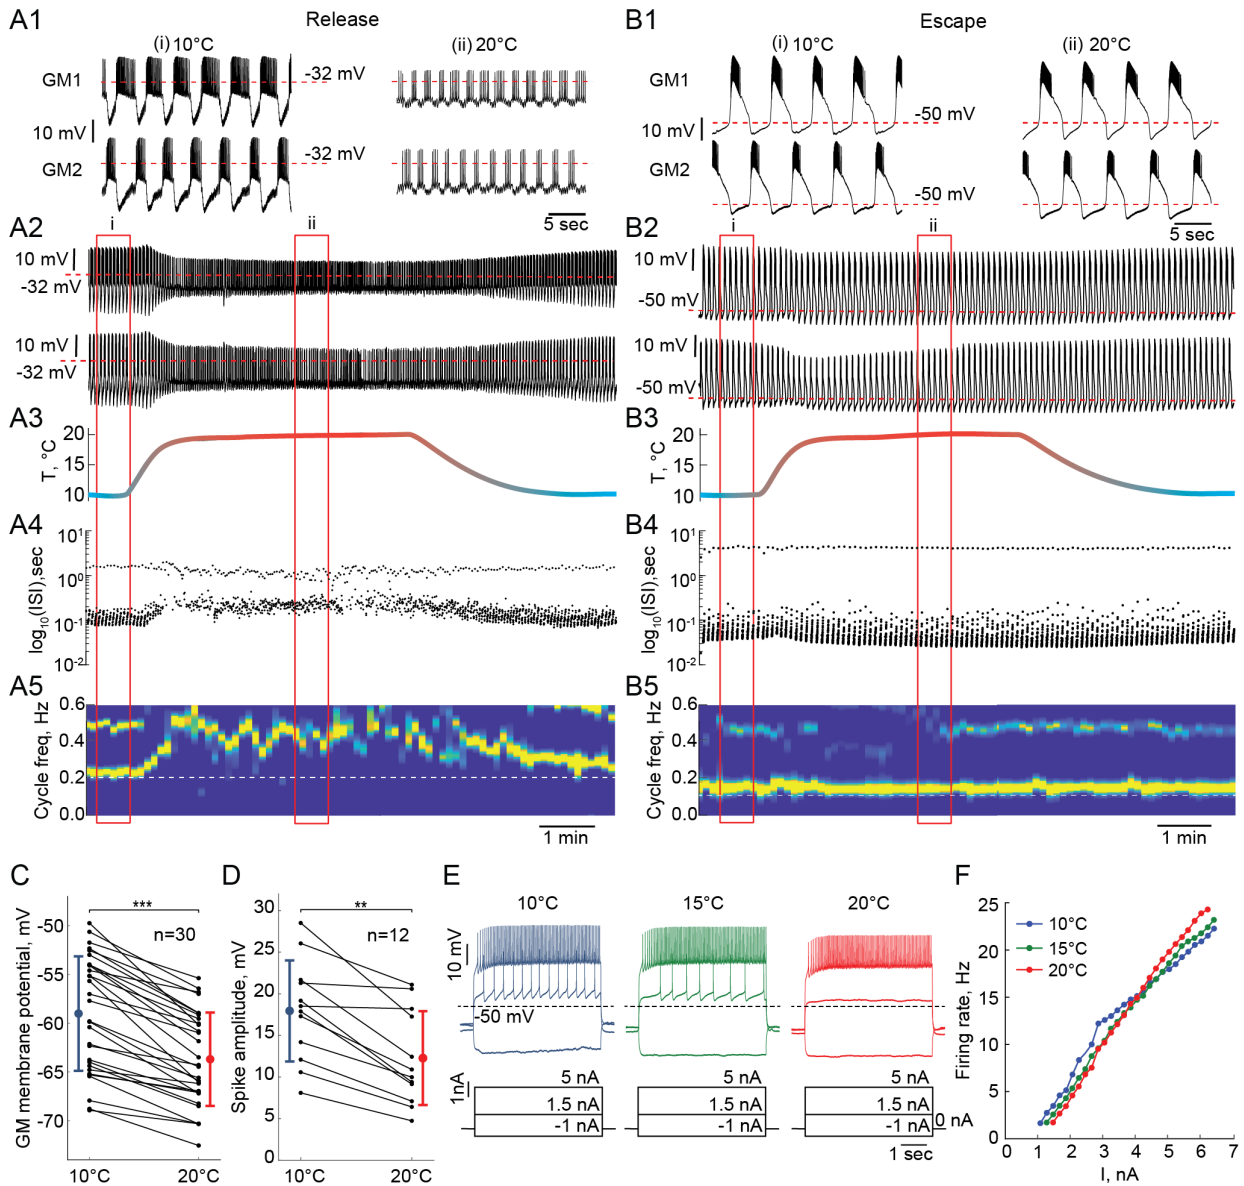

358

359 **Figure 5. Response of reciprocally inhibitory circuits with release and escape**  
 360 **mechanisms and temperature-independent artificial synaptic and H currents to an**  
 361 **increase in temperature. A1)** 25 second segments of the activity of a half-center circuit with a  
 362 release mechanism at 10°C and 20°C. **A2)** Voltage traces of a half-center oscillator network in  
 363 release during the increase in temperature for the entire representative experiment. **A3)** Saline  
 364 temperature. **A4)** Inter spike intervals (ISI) of GM1 neuron during an increase in temperature  
 365 plotted on a log scale. **A5)** Spectrogram of the GM1 voltage trace, showing an increase in  
 366 oscillation frequency at high temperature. Color code represents the power spectral density,  
 367 with yellow representing the maximum power and blue the minimum power. Low-frequency  
 368 band with the strongest power corresponds to the fundamental frequency of the periodic signal;  
 369 secondary band at higher frequency corresponds to its 2f harmonic. **B1-5)** Same as (A1-5) for a  
 370 half-center oscillator circuit with an escape mechanism. **C)** GM resting membrane potentials at  
 371 10°C and 20°C for all the recorded neurons (n=30). Each line corresponds to one neuron,  
 372 colored circles and lines correspond to means  $\pm$  standard deviation. Membrane potential of GM



373 neurons is significantly more hyperpolarized at 20°C relative to 10°C ( $-59.0 \pm 5.87$  mV at 10°C  
374 vs  $-63.7 \pm 4.8$  mV at 20°C, \*\*\*  $p = 2 \cdot 10^{-6}$ , Wilcoxon signed rank-sum test). **D)** GM spike  
375 amplitudes at 10°C and 20°C measured at -40 mV in response to a current step for all the  
376 neurons (n=12). The amplitude of GM spikes is significantly smaller at 20°C than at 10°C  
377 ( $17.9 \pm 6.1$  mV at 10°C vs  $12.3 \pm 5.6$  mV at 20°C, \*\*\*  $p = 0.0005$ , Wilcoxon signed rank-sum  
378 test). **E)** Representative voltage traces from a single GM neuron in response to current steps  
379 recorded at 10°C (blue), 15°C (green) and 20°C (red). **F)** Frequency-current (F-I) relationships at  
380 10°C (blue), 15°C (green) and 20°C (red) of the neuron from the representative experiment in  
381 panel (E).

### 382 ***Effect of temperature on the intrinsic properties of GM neurons***

383 To explain the observed changes in the circuit output on the basis of the changes  
384 in temperature, we characterized the intrinsic properties of the GM neurons in response  
385 to changes in temperature. We measured the mean resting membrane potential of GM  
386 neurons and their responses to current steps at temperatures between 10°C and 20°C.  
387 The membrane potential of GM neurons significantly hyperpolarized as temperature  
388 was increased from 10°C to 20°C (Figure 5C, n=30,  $p < 0.001$ , Wilcoxon signed rank-  
389 sum test). This alters the relative position of the synaptic threshold within the envelope  
390 of membrane potential oscillation that defines the oscillation mechanism.

391 Spike amplitude, measured at -40 mV, decreased significantly with the increase  
392 in temperature from 10°C to 20°C (Figure 5D, n=12,  $p < 0.001$ , Wilcoxon signed rank-  
393 sum test). This decrease in the spike amplitude decreases the robustness of half-center  
394 oscillators in a release mechanism, because at depolarized synaptic thresholds, the  
395 spikes contribute significantly to the accumulation of synaptic current. In line with this,  
396 when spikes were blocked by TTX, the range of stable alternating activity was  
397 significantly reduced and dominated by synaptic escape (Sharp et al., 1996). Finally, we  
398 measured frequency-current (F-I) relationships (n=12) and voltage-current relationships  
399 (V-I, n=9) of GM neurons between 10°C and 20°C. Figure 5E shows representative  
400 voltage traces from a single GM neuron in response to current steps at 10°C, 15°C and  
401 20°C. GM neurons required more current to initiate spiking at higher temperatures  
402 (Figure 5F). The F-I curves became steeper at higher temperatures (Figure 5F). There  
403 was no significant difference in the input resistance of GM neurons, measured by  
404 injecting negative current steps, at 10°C and at 20°C (n=10,  $p=0.32$ , Wilcoxon signed  
405 rank-sum test). The changes in the intrinsic properties of GM neurons with temperature,  
406 i.e. hyperpolarization of membrane potential and decrease in the spike amplitude, are

407 similar to previously reported changes in other neurons, including locust flight neurons  
408 (Xu and Robertson, 1994; Xu and Robertson, 1996), *C. borealis* Lateral Gastric (LG)  
409 neurons (Städle et al., 2015).

410 Taken together, a combination of two factors: a relative depolarization of the  
411 synaptic threshold due to membrane potential hyperpolarization and a decrease in the  
412 spike amplitude, cause a loss of oscillations in the circuits with a release mechanism at  
413 high temperatures. At high temperatures, the synaptic threshold becomes more  
414 depolarized than the top of the envelope of membrane potential oscillations, so that the  
415 transition between the active and inhibited states is governed by spiking activity (Figure  
416 5A). In turn, a decrease in the spike amplitude leads to a decrease in the amplitude of  
417 the synaptic current, smaller hyperpolarization of a postsynaptic neuron, and, thus,  
418 smaller activation of H current in the postsynaptic neuron, decreasing the robustness of  
419 the oscillations. The difference in robustness of the circuits with a release mechanism is  
420 partially due to the individual variability in the sensitivity of the intrinsic properties of GM  
421 neurons to temperature changes.

422 While circuits with an escape mechanism that are comprised of neurons with  
423 similar intrinsic properties remain robust to an increase in temperature (Figure 5B),  
424 circuits comprised of the neurons with substantially different intrinsic excitability  
425 properties often “crash” when the temperature increases. In the intrinsic escape  
426 mechanism, the ability of the neuron to depolarize above synaptic threshold and escape  
427 their inhibition relies on its intrinsic excitability. If one of the neurons is much less  
428 excitable than the other neuron it will be constantly suppressed by the more excitable  
429 neuron, not allowing the transition between the states to happen.

### 430 ***The role of temperature-dependence of synapses and H current in the behavior*** 431 ***and robustness of reciprocally inhibitory circuits***

432 To study the effect of temperature-dependence in the parameters of the synaptic  
433 and H currents on the circuit responses to temperature, we implemented  
434 the temperature-dependence 1) only in synaptic and H conductances, 2) in both  
435 conductances and activation rates of the synaptic and H currents. Figure 6 illustrates  
436 the behavior of representative escape and release circuits in response to gradual  
437 temperature increases in all the cases, including the case of temperature-insensitive

438 currents for a comparison (right panels of Figure 6). The top panels of Figure 7 show  
439 the percent change in cycle and spike frequencies of the representative circuits from  
440 Figure 6. The bottom panels of Figure 7 show a summary of the effects of increasing  
441 temperature on multiple characteristics of circuit outputs across all experimental  
442 conditions (N=33). The case of temperature-independent synapses is described in detail  
443 in the previous section and is summarized in Figure 7 along with the other cases. All  
444 statistical tests, significance analyses, number of circuits/neurons and other relevant  
445 information for data comparison are provided in Tables S1-8.

446  *$Q_{10} = 2$  for the conductances and  $Q_{10} = 1$  for the activation rates of the synaptic and H*  
447 *currents*

448 We set the  $Q_{10}$ , a commonly used metric describing the rate of change of a  
449 biological process due to increase in temperature by 10°C, to 2 for the conductances of  
450 the synaptic and H currents (Figure 6B1 release, 6B2 escape). This  $Q_{10}$  value is a  
451 typical value for experimentally measured  $Q_{10}$ s in STG neurons (Tang et al., 2010).  
452 Temperature driven increase in the conductances of the synaptic and H currents  
453 increases the amplitude of oscillations, thus, making the circuits with a release  
454 mechanism more robust (Figure 6B1 voltage traces, Figure 7H). The cycle frequency of  
455 the circuits with a release mechanism decreases with an increase in temperature  
456 (Figure 6B1 spectrogram, Figure 7A,E), driven by the increases in both conductances in  
457 accordance with the findings shown in the right panel of Figure 3B. On average,  
458 temperature-dependence in the synaptic and H conductances makes circuits with a  
459 release mechanism more robust to temperature increase. However, when circuits were  
460 comprised of neurons with substantially different intrinsic properties, the decrease in the  
461 on-off transition frequency led to unstable oscillations.

462 The cycle frequency of the circuits with an escape mechanism remains constant  
463 over the whole temperature range (Figure 6B2 spectrogram, Figure 7B,E), similar to the  
464 case of temperature-independent synapses. Temperature-induced increases in the  
465 synaptic and H conductances counteract each other in the case of the escape  
466 mechanism as illustrated in the left panel of Figure 3B, (i.e. the frequency is conserved  
467 along the diagonal of  $g_H$ - $g_{syn}$  map). The spike frequency and number of spikes per burst

468 of the circuits with either release of escape mechanisms significantly increase from 10°C  
 469 to 20°C (Figure 7C,D,H).

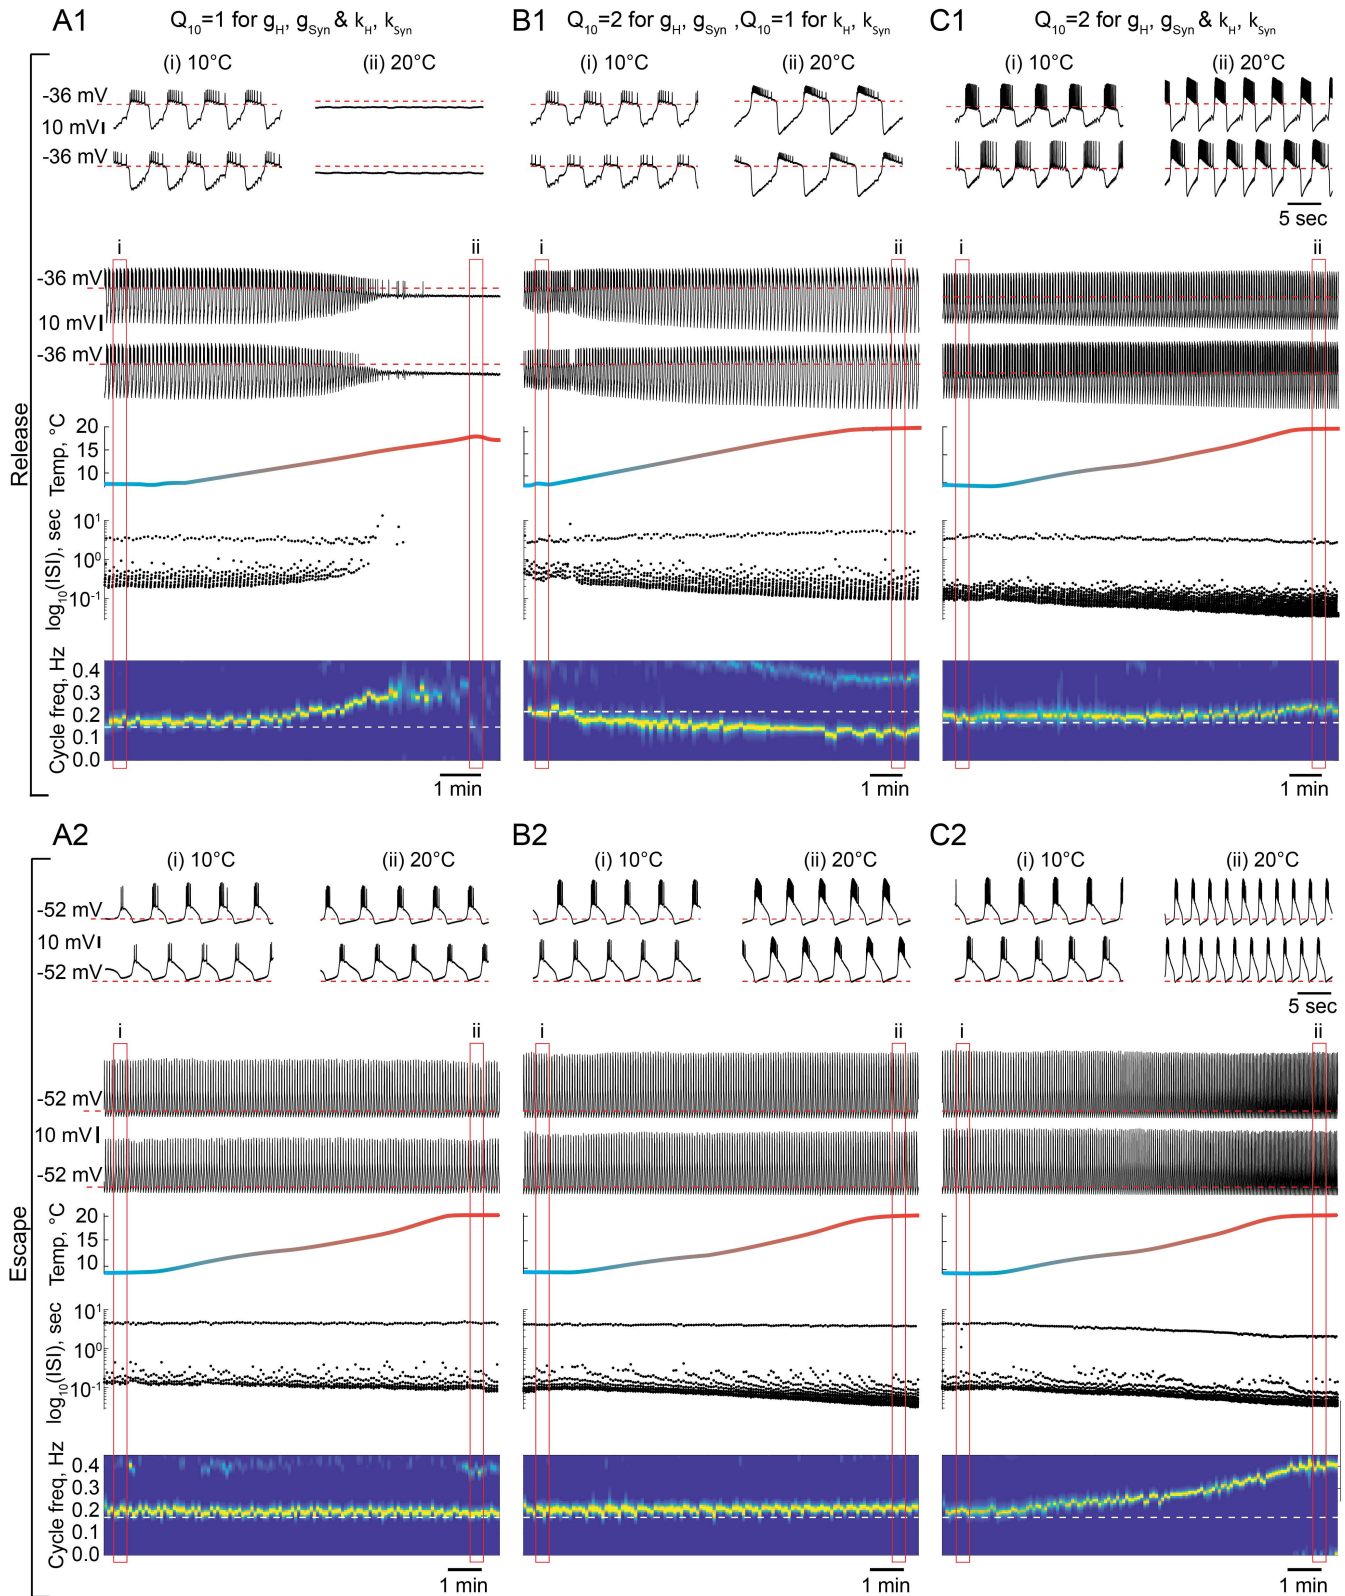

472 **Figure 6. The role of temperature dependence in the synaptic and H currents in the**  
473 **response of the circuits with release and escape mechanisms to changes in temperature.**  
474 **A1)** Representative example of the behavior of a half-center oscillator in release in case of  
475 temperature-independent synaptic and H conductances and activation rates of these currents  
476 ( $g_H, g_{Syn}, k_H, K_{Syn} Q_{10}=1$ ). Figure follows the same format as figure 5A-B. **A2)** Same condition as  
477 in (A1) for a circuit in escape. **B1)** Representative example of the behavior of a half-center  
478 oscillator in release in case of temperature-dependence of the synaptic and H conductances  
479 with a  $Q_{10}=2$  and temperature-independent activation rates ( $k_H, K_{Syn} Q_{10}=1$ ). **B2)** Same condition  
480 as in (B1) for a circuit in escape. **C1)** Representative example of the behavior of a half-center  
481 oscillator in release in case of temperature-dependence of the synaptic and H conductances  
482 and activation rates with a  $Q_{10}=2$ . **C2)** Same condition as in (C1) for a circuit in escape.

483  *$Q_{10} = 2$  for the conductances and the activation rates of the synaptic and H currents*

484 We next implemented temperature-dependence in both the conductances and  
485 activation rates of the synaptic and H currents by setting these  $Q_{10}s$  to 2. Both, escape  
486 and release circuits were most robust to the changes in temperature in this case, due to  
487 the increase in the amplitude of the oscillations and faster transitions between the on-off  
488 states (Figure 6C1 release, C2 escape). Although both circuits were bursting robustly  
489 during the entire temperature range, there was a significant difference in the frequency  
490 responses of the escape and release circuits. Across all experiments, the cycle  
491 frequency of the circuit with a release mechanism did not significantly change over 10°C  
492 (Figure 6C1 spectrogram, Figure 7E), while the cycle frequency of the circuits with an  
493 escape mechanism increased dramatically (Figure 6C2 spectrogram, Figure 7H). In  
494 release, an increase in cycle frequency governed by changes in the intrinsic properties  
495 of the neurons and by an increase in the activation rates of synaptic and H currents was  
496 counteracted by a decrease in cycle frequency governed by an increase in synaptic and  
497 H conductances. Combination of these processes keeps the cycle frequency of release  
498 circuits nearly constant throughout the temperature ramp. In escape, an increase in  
499 cycle frequency is mostly driven by an increase of the activation rate of H current. The  
500 spike frequency and the oscillation amplitude of circuit with either release or escape  
501 mechanisms significantly increased over 10°C, similar to the case of  $Q_{10} = 2$  for  
502 conductances only (Figure 7C,D,F). The number of spikes per burst of the escape  
503 circuits did not significantly change with the increase in temperature, unlike in the  
504 release circuits (Figure 7G).

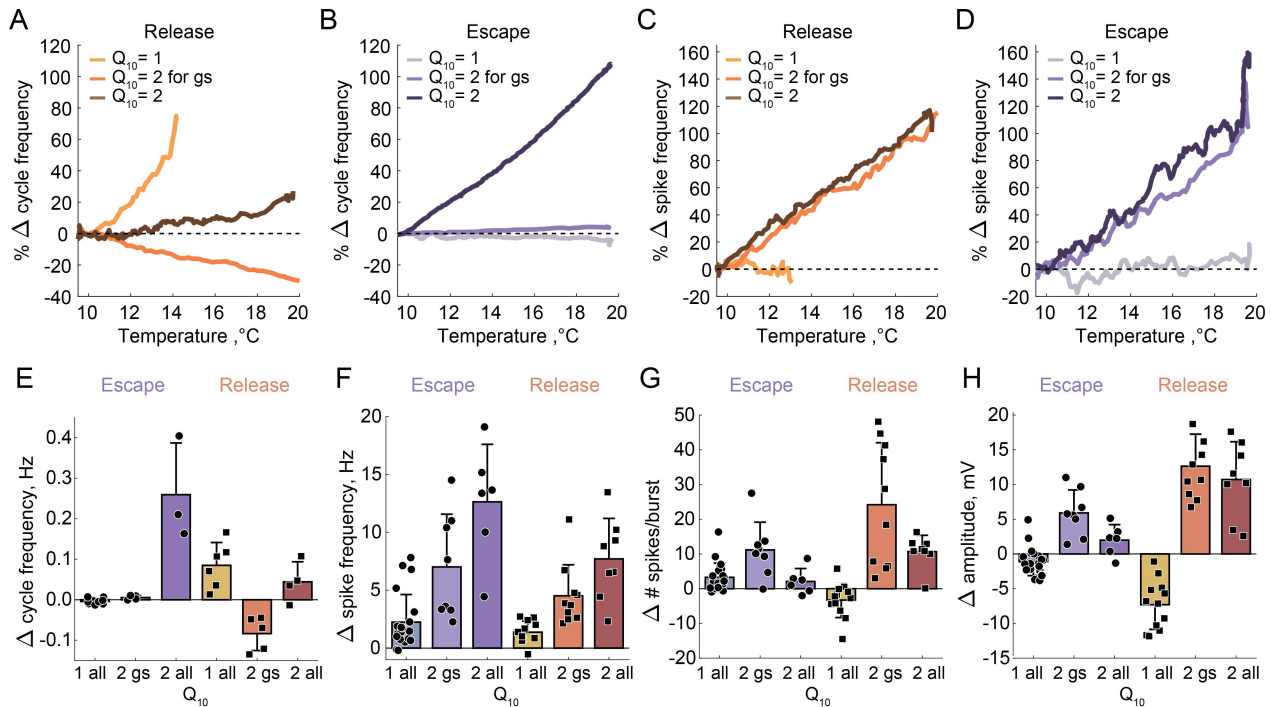

505

506 **Figure 7. Summary of the effects of temperature on the characteristics of half-center**  
 507 **oscillators with escape and release mechanisms and different temperature-dependences**  
 508 **in the synaptic and H currents. A)** Percent change in cycle frequency of the release circuits  
 509 shown in Figure 6 with an increase in temperature from 10°C to 20°C. **B)** Percent change in  
 510 cycle frequency of the escape circuits shown in Figure 6 with an increase in temperature from  
 511 10°C to 20°C. **C)** Percent change in spike frequency of the release circuits in Figure 6 with an  
 512 increase in temperature from 10°C to 20°C. **D)** Percent change in spike frequency of the escape  
 513 circuits in Figure 6 with an increase in temperature from 10°C to 20°C. **E)** Change in cycle  
 514 frequency with an increase in temperature from 10°C to 20°C across all experimental conditions  
 515 (N=33). **F)** Change in spike frequency across all experimental conditions. **G)** Change in number  
 516 of spikes per burst across all experimental conditions. **H)** Change in slow-wave amplitude  
 517 across all experimental conditions.

518

519

520

521

522

523

524

525

526

527

528

Different characteristics of the circuit output are differently sensitive to temperature increase depending on the mechanism of oscillation and  $Q_{10}$ s of the synaptic and ionic currents. The duty cycle was relatively independent of variations in temperature in all the cases (Tables S1-2). To assess whether temperature affects the mechanism of oscillation we calculated the change in ERQ over 10°C for different  $Q_{10}$  cases (Table S1,8). ERQ did not significantly change for the release circuits. ERQ became significantly more positive for the escape circuits with temperature-independent synaptic and H currents, indicating the change in the mechanism of oscillation towards release with the increase in temperature. An example of the change in the mechanism of oscillation from escape at 10°C all the way to release at 20°C is shown in Figure S2. During the transition, the half-center exhibited characteristics of both mechanisms with

529 various balances between the mechanisms at different temperatures. The cycle  
530 frequency remained constant for a wide range of temperatures until the on-off  
531 transitions in the circuit were dominated by the synaptic release mechanism (Figure  
532 S2E).

533 ***Effect of a neuromodulatory current on the robustness of circuits with release***  
534 ***and escape mechanisms***

535 A number of neurotransmitters and peptides converge on an inward current with  
536 the same voltage dependence, known as  $I_{MI}$  (Swensen and Marder, 2000, 2001). To  
537 explore the effect of  $I_{MI}$  on reciprocally inhibitory circuits with different mechanisms of  
538 oscillation, we injected artificial  $I_{MI}$  via the dynamic clamp into both neurons comprising  
539 half-center oscillators (Figure 8A) and varied the synaptic threshold to alter the  
540 mechanism. Figure 8B illustrates representative recordings of a half-center oscillator at  
541 three different synaptic thresholds corresponding to escape, mixture, and release  
542 mechanisms in control (black traces) and with the addition of  $I_{MI}$  (blue traces). We  
543 calculated the frequency of oscillations as a function of the synaptic threshold in control  
544 and with the addition of  $I_{MI}$  ( $g_{MI} = 150$  nS). Figure 8C shows this relationship for the  
545 representative experiment in panel B.  $I_{MI}$  produced no effect on the cycle frequency of  
546 escape circuits, while  $I_{MI}$  decreased the cycle frequency of the circuits with a mixture of  
547 mechanisms or in release. Addition of  $I_{MI}$  increased the robustness of circuits with a  
548 release mechanism, increasing the amplitude of oscillations (Figure 8B, right most  
549 traces) and expanding the range of synaptic thresholds producing stable antiphase  
550 bursting pattern of activity (Figure 8C). At the same time,  $I_{MI}$  made oscillations less  
551 stable and irregular for circuits operating with a mixture of mechanisms. This is obvious  
552 in the amplified asymmetry between the units comprising the circuit (Figure 8B middle  
553 traces), an increase in the standard deviation of the cycle frequency and a break in the  
554 central region of the cycle frequency curve corresponding to a mixed regime (Figure  
555 8C).

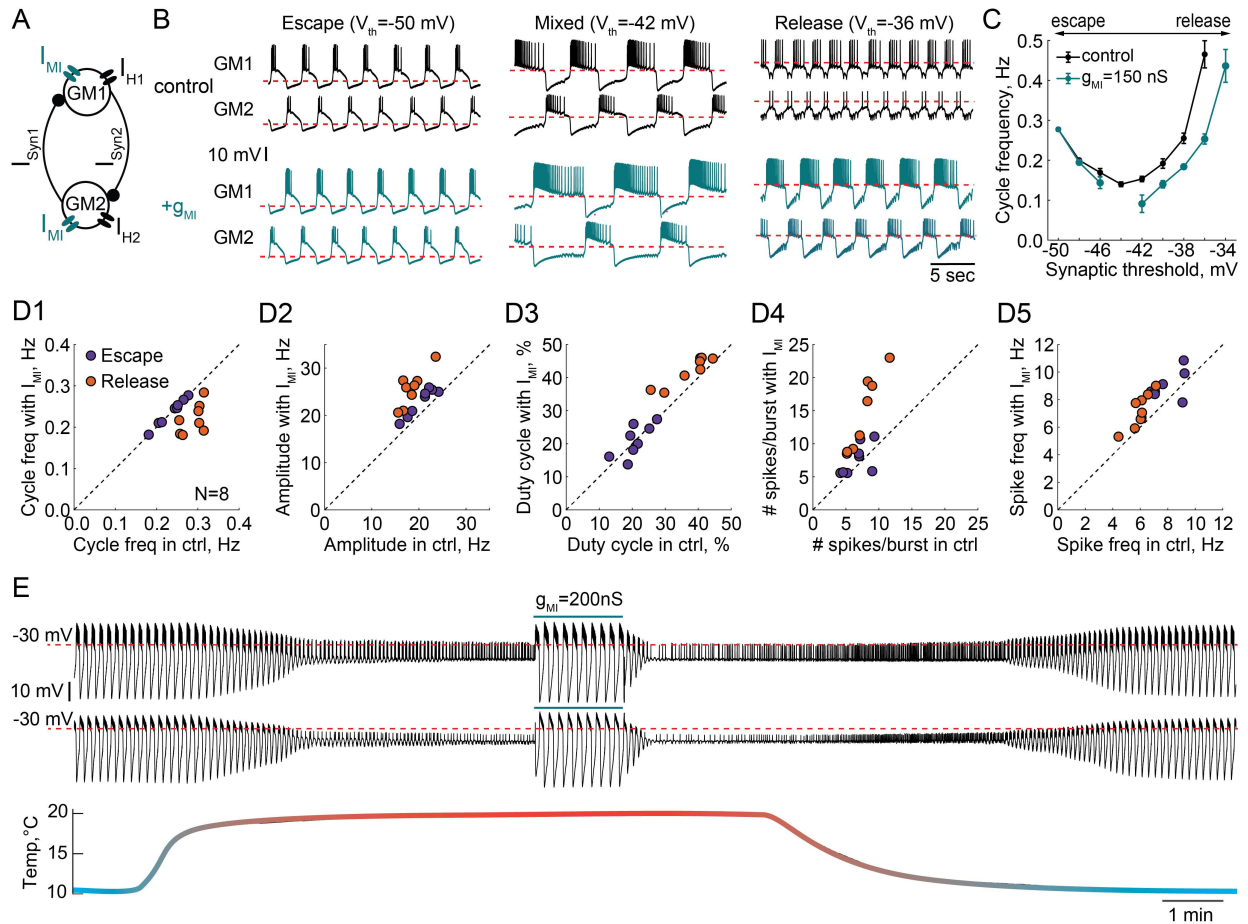

556

557 **Figure 8. Effect of a modulatory current ( $I_{MI}$ ) on the behavior of reciprocally inhibitory**  
 558 **circuits with different oscillatory mechanisms. A)** A schematic representation of a  
 559 reciprocally inhibitory circuit with a dynamic clamp modulatory current ( $I_{MI}$ ). **B)** Representative  
 560 traces of a half-center oscillator for different synaptic thresholds in control (black) and with the  
 561 addition of  $I_{MI}$  ( $g_{MI}=150$  nS, blue). **C)** Oscillation frequency of the circuit in panel B as a function  
 562 of the synaptic threshold in control (black) and with the addition of  $I_{MI}$  (blue). **D)** Characterizing  
 563 the half-center oscillator output in escape and release with the addition of  $I_{MI}$  ( $N=8$ ). **D1)** Cycle  
 564 frequency (Escape:  $0.236 \pm 0.033$  Hz in control vs  $0.237 \pm 0.032$  Hz with  $I_{MI}$ , n.s.  $p=0.38$ , paired-  
 565 sample t-test; Release:  $0.289 \pm 0.026$  Hz in control vs  $0.22 \pm 0.036$  Hz with  $I_{MI}$ , \*\*\*  $p=0.0003$ ,  
 566 paired-sample t-test). **D2)** Slow-wave amplitude (Escape:  $20.5 \pm 2.8$  mV in control vs  $23.0 \pm 2.9$   
 567 mV with  $I_{MI}$ , \*\*\*  $p<0.0001$ , paired-sample t-test; Release:  $18.4 \pm 2.5$  mV in control vs  $25.7 \pm 3.8$   
 568 mV with  $I_{MI}$ , \*\*\*  $p<0.0001$ , paired-sample t-test). Amplitude increase in release is significantly  
 569 larger than in escape, \* $p=0.02$ , paired-sample t-test). **D3)** Duty cycle (Escape:  $20.8 \pm 4.3$  % in  
 570 control vs  $21.1 \pm 4.9$  % with  $I_{MI}$ , n.s.  $p=0.8$ , paired-sample t-test; Release:  $37.3 \pm 6.5$  % in control  
 571 vs  $42.2 \pm 4.3$  % with  $I_{MI}$ , \* $p=0.002$ , paired-sample t-test). **D4)** Number of spikes per burst  
 572 (Escape:  $6.7 \pm 1.9$  in control vs  $7.6 \pm 2.3$  with  $I_{MI}$ , n.s.  $p=0.2$ , paired-sample t-test; Release:  $7.6 \pm$   
 573  $2.2$  in control vs  $14.4 \pm 5.7$  with  $I_{MI}$ , \*\* $p=0.001$ , paired-sample t-test). **D5)** Spike frequency  
 574 (Escape:  $7.8 \pm 1.2$  Hz in control vs  $8.7 \pm 1.3$  Hz with  $I_{MI}$ , \* $p=0.029$ , paired-sample t-test; Release:  
 575  $6.0 \pm 0.8$  Hz in control vs  $7.2 \pm 1.3$  Hz with  $I_{MI}$ , \*\* $p=0.001$ , paired-sample t-test). **E)**  $I_{MI}$  restores  
 576 the oscillations in the circuit with a release mechanism that stopped oscillating at high  
 577 temperature. Example voltage traces of a half-center oscillator circuit in release during an  
 578 increase in temperature from  $10^\circ\text{C}$  to  $20^\circ\text{C}$ . In this example, synaptic and H conductances and  
 579 activation rates are temperature-independent.



580 We quantified the change in cycle frequency, oscillation amplitude, duty cycle,  
581 spike frequency and number of spikes per burst across both neurons in circuits with the  
582 addition of modulatory current (N=8, Figure 8D1-5). The cycle frequency of escape  
583 circuits did not change with the addition of  $I_{MI}$  but significantly decreased in release  
584 circuits (Figure 8D1).  $I_{MI}$  increased the amplitude of oscillations in both modes, with a  
585 significantly larger increase in release (Figure 8D2), making the oscillations more  
586 robust. The duty cycle of the circuits in escape was statistically invariant to modulation,  
587 while there was a small but statistically significant increase in the duty cycle of the  
588 circuits in release (Figure 8D3). The number of spikes per burst significantly increased  
589 with  $I_{MI}$  in release but not escape (Figure 8D4). Finally,  $I_{MI}$  produced a small but  
590 statistically significant increase in the frequency of the spikes within bursts for both  
591 types of circuits (Figure 8D5). Overall, across all the characteristics, circuits with a  
592 release mechanism were significantly more sensitive to a modulatory current than  
593 circuits with an escape mechanism.

594 These observations suggest that the same type of modulation can produce vastly  
595 different effects on the output of a circuit depending on the underlying mechanism of  
596 oscillation, and can make a circuit more or less robust to subsequent perturbations,  
597 potentially changing its sensitivity to pharmacological agents. For example,  $I_{MI}$  increases  
598 the robustness of the circuit perturbed by an increase in temperature (Figure 8E).  $I_{MI}$   
599 restored the antiphase oscillations in a release circuit at high temperature, by  
600 depolarizing the neurons over the synaptic threshold and increasing the amplitude of  
601 oscillations. This is similar to the neuromodulatory rescue of the temperature-induced  
602 cessation of the gastric mill rhythm (Städle et al., 2015). This could be one of the  
603 mechanisms by which neuromodulators improve circuit robustness.

604

## 605 Discussion

606 One of the most difficult problems facing systems neuroscience is to determine  
607 the mechanisms that generate a given circuit output. The present work is designed to  
608 provide some fundamental insights into that problem, by studying a purposefully simple  
609 rhythmic circuit. Because some of the circuit parameters are constructed with the  
610 dynamic clamp, and are therefore known, we have been able to gain insight into how  
611 circuits that appear similar in function can respond differently to the same perturbations.  
612 In dynamic clamp hybrid circuits, we have access to some of the hidden variables that  
613 define the dynamical mechanisms governing circuit behavior. At the same time, we  
614 have not sacrificed the complexity of the biological neurons. This allowed us to study  
615 how the interaction between biophysical and dynamical properties of these neural  
616 circuits define their robustness. The findings of this paper have implications for  
617 understanding animal-to-animal variability in circuit responses to various stressors and  
618 modulators.

619 Unperturbed half-center circuits with escape and release mechanisms can have  
620 very similar characteristics, including burst and spike frequencies. Thus, if the  
621 mechanism is not known *a priori*, it is impossible to identify the underlying mechanisms  
622 of circuit function from the baseline spiking activity. One way to reveal hidden  
623 differences in the mechanism underlying circuit dynamics is by perturbing them. We  
624 showed that reciprocally inhibitory circuits with different underlying oscillation  
625 mechanisms are not equally robust to perturbations. Particularly, circuits in release  
626 mode are robust to variations in synaptic and H conductances, but sensitive to an  
627 increase in temperature and modulation. In contrast, the circuits in escape rely on tight  
628 correlations between synaptic and H conductances to generate robust bursting but are  
629 resilient to increases in temperature and modulation.

630 Previous computational studies showed that half-center oscillators relying on  
631 either release or escape mechanisms differentially respond to synaptic inputs and  
632 current pulses (Daun et al., 2009, Zhang and Lewis, 2013). Daun et al. (2009) used  
633 model neurons with or without persistent sodium current to form half-center oscillators.  
634 When asymmetric noise was injected into only one of the neurons, half-centers  
635 operating in escape had a larger range of oscillation period than did circuits with release

636 or a mixture of mechanisms (Daun et al., 2009). Additionally, half-centers built with two  
637 Morris-Lecar model neurons have significantly different phase response properties and  
638 phase locking dynamics depending on whether they operate in escape or release  
639 (Zhang and Lewis, 2013).

640 Model half-center circuits are typically built with two identical neurons, although  
641 experimental data suggest that the conductance values and intrinsic properties of  
642 neurons even of the same type can differ significantly (Doloc-Mihu and Calabrese,  
643 2014; Goldman et al., 2001; Marder and Goaillard, 2006; Prinz et al., 2003; Prinz et al.,  
644 2004; Roffman et al., 2012; Schulz et al., 2006; Schulz et al., 2007; Srikanth and  
645 Narayanan, 2015; Swensen and Bean, 2005; Temporal et al., 2012; Tobin et al., 2009;  
646 Tran et al., 2019). The studies in which the dynamic clamp is used to create half-center  
647 circuits from biological neurons profit from natural cell-to-cell and animal-to-animal  
648 variability to investigate circuit responses to stressors and modulators. For example,  
649 Grashow et al. (2009) found that the application of either serotonin or oxotremorine (a  
650 muscarinic receptor agonist) on average increased the oscillation frequency and made  
651 alternating bursting more robust by extending the parameter range over which bursting  
652 exists. However, there was a substantial variability in individual responses of half-center  
653 circuits to neuromodulation, with a few circuits showing “anomalous” decreases in cycle  
654 frequency in the presence of modulators. Based on the results of the present study,  
655 some of the variability in Grashow et al. (2009) is likely due to the differences in  
656 underlying mechanisms of oscillations across the circuits and the degree of asymmetry  
657 between the units comprising the circuit. We show that the same neuromodulatory  
658 current can either have no effect on the same circuit if operating in escape, destabilize  
659 the circuits if operating in mixed mode or increase the robustness of the circuit if  
660 operating in release (Figure 8). Thus, knowing the dynamical mechanism involved in  
661 generating the circuit output is crucial for understanding the circuit responses to stimuli.

662 A similar variability in the response to a neuromodulator is seen in the crustacean  
663 gastric mill rhythm. This rhythm is generated by a half-center oscillator and can be  
664 elicited by multiple mechanisms (Powell et al., 2021b). Stimulation of the MCN1  
665 projection neuron or bath-applying the peptide CabPK result in gastric mill rhythms with  
666 similar output patterns (Powell et al., 2021b). Despite the similarity of their baseline

667 activity patterns, these rhythms rely on participation of different neurons and respond  
668 differently to hormone CCAP, which is known to activate  $I_{MI}$  (Swensen and Marder,  
669 2000, 2001). CCAP, slows down MCN1-generated rhythm, but, in contrast, speeds up  
670 CabPK-generated rhythm (Kirby and Nusbaum, 2007; Powell et al., 2021b). We  
671 propose that the MCN1 rhythm might operate in release, while CabPK-rhythm operates  
672 in escape. Thus, different modulators can elicit different dynamical mechanisms of  
673 rhythm generation. In support of this hypothesis, it has been reported that similar gastric  
674 mill rhythms, which are generated by a stimulation of disparate neuromodulatory  
675 pathways, have different temperature sensitivity (Städle et al., 2015; Powell et al.,  
676 2021a). A modest temperature increase of 3°C abolishes the MCN1-rhythm (Städle et  
677 al., 2015), in contrast, the VCN-rhythm is temperature-robust over a wide range of  
678 temperatures, between 7°C and 25°C (Powell et al., 2021a). We propose that the  
679 difference in temperature sensitivity between the two versions of the gastric mill rhythm  
680 could be explained by the differences in their dynamical mechanisms of oscillation.

681 Many studies found significant correlations between the conductances of voltage-  
682 dependent currents in both invertebrates and vertebrates (Amendola et al., 2012;  
683 Calabrese et al., 2011; Goillard et al., 2009; Khorkova and Golowasch, 2007; Schulz et  
684 al., 2006; Schulz et al., 2007). It has been argued that reliable circuit output and  
685 resilience to perturbations are enhanced by the conductance correlations, rather than by  
686 the particular values of individual parameters (Olypher and Calabrese, 2007; Onasch  
687 and Gjorgjieva, 2020; Tobin et al., 2009; Zhao and Golowasch, 2012). In line with this,  
688 we found that synaptic and H conductances are positively correlated in the circuits with  
689 escape mechanisms (Figure 3A), contributing to the robustness of these circuits to  
690 variations in temperature. Changes in the synaptic and H conductances with  
691 temperature counteract each other keeping the frequency of oscillations stable for a  
692 wide range of temperatures (Figure 6 B2).

693 Because temperature differentially affects many nonlinear processes shaping  
694 circuit output, it is a nontrivial challenge for a circuit to maintain its function over a wide  
695 range of temperatures. Despite that, many neuronal circuits, including the pyloric and  
696 half-center driven gastric mill circuits of crustaceans, are temperature compensated and  
697 function over an extended physiological temperature range (Haddad and Marder, 2018;

698 Kushinsky et al., 2019; Powell et al., 2021a; Soofi et al., 2014; Tang et al., 2010; Tang  
699 et al., 2012). Complicating the situation, circuit robustness to temperature is strongly  
700 influenced by the modulatory environment (Haddad and Marder, 2018; Soofi and Prinz,  
701 2015; Städele et al., 2015). Obtaining insights into the mechanisms that underly acute  
702 temperature robustness is difficult. Temperature is a particularly difficult perturbation to  
703 model in biologically plausible circuits because there are many free parameters to set,  
704 as temperature affects both the conductances and activation rates of the currents,  
705 making it a highly unconstrained problem. Because it is difficult to measure the  
706 temperature dependence of all of the currents in a given cell type (Tang et al., 2010),  
707 most modeling studies (Alonso and Marder, 2020; Caplan et al., 2014; O'Leary and  
708 Marder, 2016; Rinberg et al., 2013) employ  $Q_{10}$  values that are only partially based on  
709 measured values. In simplified models it is possible to study the dynamical mechanisms  
710 of robustness and characterize bifurcations as a function of temperature (Rinberg et al.,  
711 2013), but many biophysical details are lost. In contrast, in the hybrid neural-computer  
712 dynamic clamp circuits studied in this paper, we can control the dynamical mechanisms  
713 governing circuit behavior and temperature-dependence in the computer-generated  
714 parameters, without making any assumptions about the temperature dependence of the  
715 intrinsic currents of the neurons. Thus, we benefit from not having to over-simplify the  
716 effects of temperature on the biological neurons.

717         It is as of yet unclear whether circuits that depend on one or another dynamical  
718 mechanism for operation are intrinsically more robust to all perturbations, or whether  
719 robustness is determined idiosyncratically for each circuit configuration and  
720 perturbation. The present study illustrates how nontrivial it is to explain circuit function  
721 on the basis of basal firing pattern alone. The dynamical mechanisms underlying half-  
722 center oscillator transitions are well defined in modeling studies that reveal the  
723 underlying interactions between hidden state variables and voltage-dependent synaptic  
724 and intrinsic currents. While theoretical studies provide mechanistic insight, it can be  
725 quite difficult to establish how those mechanisms are instantiated in biological neurons.  
726 Moreover, virtually all previous computational studies in half-centers were done with  
727 identical neurons, and in no case will two or more biological neurons even of the same  
728 cell type, be identical. The dynamic clamp studies here provide access to some of the

729 fundamental dynamical mechanisms important for generation of antiphase oscillations,  
730 while retaining the intrinsic “features” of the biological neurons. In conventional current  
731 clamp experiments the investigator does not have a continuous access to state  
732 variables of the currents, while in the dynamical clamp experiments state variables of  
733 the computer-generated currents are readily accessible. A fundamental conclusion of  
734 this work is that very nuanced changes in circuit mechanism can profoundly alter the  
735 circuit robustness to perturbations and inputs. Thus, a challenge for the future will be  
736 developing new methods to extract dynamical mechanisms underlying circuit function  
737 from biological circuits while they are in operation.

738

### 739 **Acknowledgments**

740 Support: NIH National Institute of Health grant 2 R01 MH046742, and the Swartz  
741 Foundation (E.O.M).

742

### 743 **Author contributions**

744 E.O.M. and E.M. designed the experiments, E.O.M and P.N. performed the experiments  
745 and data analysis. E.O.M wrote the manuscript, and all authors edited the manuscript.

746

### 747 **Declaration of interests**

748 The authors declare no competing interests.

749

750

751

752

753

754

755

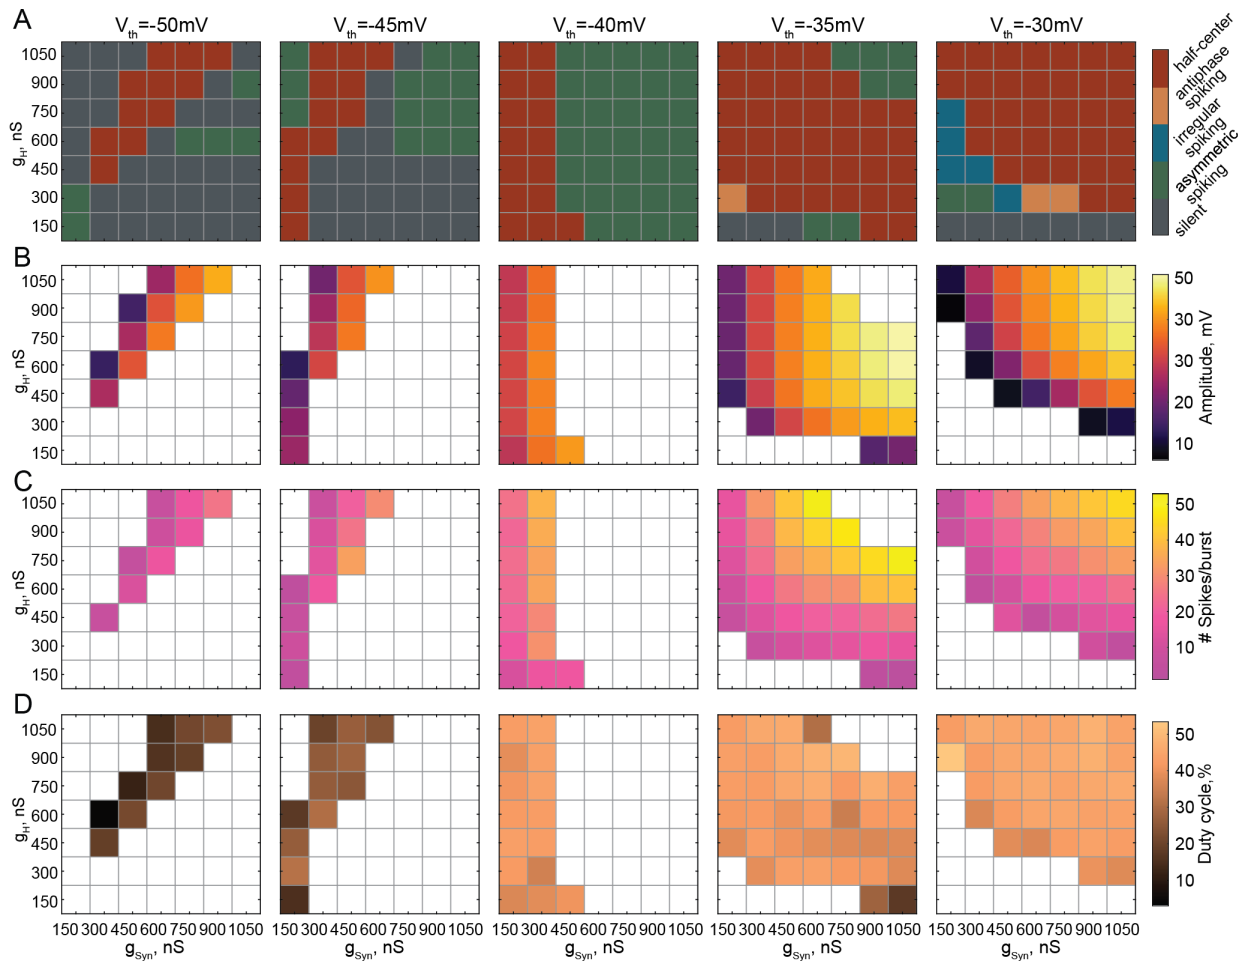

756

757 **Figure S1. Supplementary figure for figure 4. A)** Activity patterns of reciprocally inhibitory  
 758 circuits for different combinations of  $g_{Syn}$  and  $g_H$  and the synaptic thresholds of -50 mV, -45 mV,  
 759 -40 mV, -35 mV and -30 mV. **B)** Dependence of the oscillation amplitude on  $g_{Syn}$  and  $g_H$   
 760 for different synaptic thresholds. **C)** Dependence of the number of spikes per burst on  $g_{Syn}$  and  $g_H$   
 761 for different synaptic thresholds. **D)** Dependence of the duty cycle on  $g_{Syn}$  and  $g_H$  for different  
 762 synaptic thresholds.

763

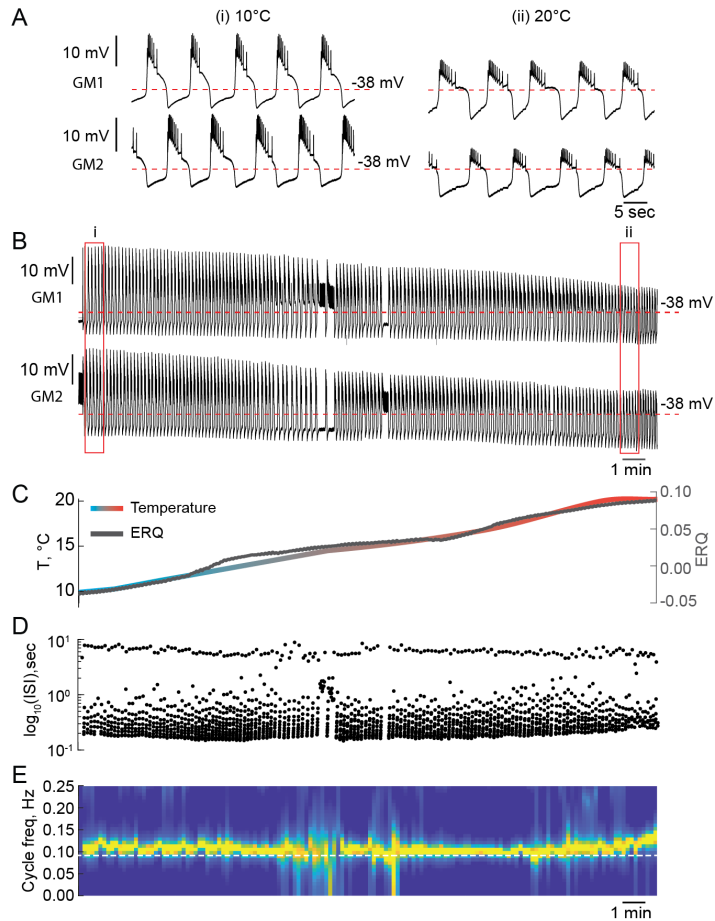

**Figure S2. Temperature can alter the mechanism of oscillations of reciprocally inhibitory circuits. A)** 1 min segments of the activity of a half-center oscillator recorded at 10°C and 20°C. **B)** Voltage traces of a half-center oscillator during the temperature ramp from the entire experiment. **C)** Temperature ramp and corresponding ERQ. Increase in temperature switches the mechanism of oscillations from a mixture of intrinsic and synaptic escape to synaptic release. **D)** Inter spike intervals (ISI) of GM1 neuron during the increase in temperature plotted on a log scale. **E)** Spectrogram of the GM1 voltage trace.



765 **METHODS**

766 **RESOURCE AVAILABILITY**

767 ***Lead contact***

768 Further information and requests for resources should be directed to the Lead Contact,  
769 Ekaterina Morozova ([morozova.e.o@gmail.com](mailto:morozova.e.o@gmail.com)).

770 ***Materials availability***

771 This study did not generate any new unique reagents.

772 *Cancer Borealis* crabs used in this study are available from Commercial Lobster  
773 (Boston, MA)

774 ***Data and code and availability***

775 Data will be publicly available upon publication.

776 Custom RTX1 modules are available on GitHub

777 ([https://github.com/eomorozova/half\\_center\\_oscillator\\_rtxi\\_module](https://github.com/eomorozova/half_center_oscillator_rtxi_module))

778 All the analysis scripts are available on GitHub ([https://github.com/eomorozova/hco-](https://github.com/eomorozova/hco-analysis)  
779 [analysis](https://github.com/eomorozova/hco-analysis)).

780 Any additional information required to reanalyze the data reported in this paper is  
781 available from the lead contact upon request.

782 **EXPERIMENTAL MODEL AND SUBJECT DETAILS**

783 Adult male Jonah Crabs, *Cancer borealis*, (N=43) were obtained from  
784 Commercial Lobster (Boston, MA) and maintained in artificial seawater at 10-12°C in a  
785 12-hour light/dark cycle. On average, animals were acclimated at this temperature for  
786 one week before use. Prior to dissection, animals were placed on ice for at least 30  
787 minutes. Dissections were performed as previously described (Gutierrez and Grashow,  
788 2009). In short, the stomach was dissected from the animal and the intact  
789 stomatogastric nervous system (STNS) was removed from the stomach including the  
790 commissural ganglia, esophageal ganglion and stomatogastric ganglion (STG) with  
791 connecting motor nerves. The STNS was pinned in a Sylgard-coated (Dow Corning)  
792 dish and continuously superfused with saline. Saline was composed of 440 mM NaCl,  
793 11 mM KCl, 26 mM MgCl<sub>2</sub>, 13 mM CaCl<sub>2</sub>, 11 mM Trizma base, 5 mM maleic acid, pH  
794 7.4 –7.5 at 23°C (~7.7–7.8 pH at 11°C).

## 795 **METHOD DETAILS**

### 796 Electrophysiology

797 Intracellular recordings from the somata of gastric mill (GM) neurons were made  
798 using two-electrode current clamp in the desheathed STG with 10–20 M $\Omega$  sharp glass  
799 microelectrodes filled with 0.6 M K<sub>2</sub>SO<sub>4</sub> and 20 mM KCl solution (Figure 1A).

800 Intracellular signals were amplified with an Axoclamp 900A amplifier (Molecular  
801 Devices, San Jose). Extracellular nerve recordings were made by building wells around  
802 nerves using a mixture of Vaseline and mineral oil and placing stainless-steel pin  
803 electrodes within the wells to monitor spiking activity. Extracellular nerve recordings  
804 were amplified using model 3500 extracellular amplifiers (A-M Systems). Data were  
805 acquired using a Digidata 1440 digitizer (Molecular Devices, San Jose) and pClamp  
806 data acquisition software (Molecular Devices, San Jose, version 10.5) and Real-Time  
807 eXperiment Interface (RTXI) software (<http://rtxi.org/>) version 2.2 or 1.4. Recordings  
808 were done with a sampling frequency of 10 kHz. For identification of GM neurons,  
809 somatic intracellular recordings were matched to action potentials on the dorsal gastric  
810 nerve (*dgn*), and/or the anterior lateral nerve (*aln*).

811 For the process of blocking descending modulatory inputs to the STG, a Vaseline  
812 well was built around the exposed portion of the *stn*. Propagation of axonal signaling,  
813 and, thus, neuromodulatory release, was blocked from upstream ganglia by replacing  
814 saline in the Vaseline well with 10<sup>-7</sup>M tetrodotoxin (TTX) in a 750 mM sucrose solution.  
815 10<sup>-5</sup>M Picrotoxin (PTX) was used to block inhibitory glutamatergic synapses (Marder  
816 and Eisen, 1984). Preparations were allowed to stabilize after decentralization and PTX  
817 application for at least 1 hour prior to building a reciprocally inhibitory circuit via dynamic  
818 clamp.

### 819 Dynamic clamp

820 To create the half-center oscillator circuits, artificial reciprocal inhibitory synaptic  
821 currents ( $I_{syn}$ ) and hyperpolarization-activated inward currents ( $I_H$ ) were added via the  
822 dynamic clamp, following the methods described in Sharp et al (1996)(Figure 1).  
823 Simulation of voltage-dependent currents in real time was done using Real-Time  
824 eXperimental Interface (RTXI 2.2 or 1.4) (<http://rtxi.org/>) (Patel et al., 2017). Custom  
825 RTXI modules were written using the programming language C++.

826 The synaptic current is given by the following expression:

$$827 \quad I_{syn} = g_{syn} \cdot s(V_{pre}) \cdot (V_{post} - E_{syn}), \quad (1 - s_{\infty}) \frac{ds}{dt} = \frac{s_{\infty} - s}{\tau_{syn}}$$

828 where  $V_{pre}$  and  $V_{post}$  are presynaptic and postsynaptic voltages,  $s$  is the synaptic gating  
829 variable,  $s_{\infty}$  is the steady-state synaptic activation, given by a sigmoidal function

$$830 \quad s_{\infty} = \frac{1}{1 + e^{\frac{V - V_{th}}{V_{slope}}}} \text{ (Figure 1B, purple and orange curves).}$$

831 The hyperpolarization-activated inward current is described in Buchholtz et al  
832 (1992):

$$833 \quad I_H = g_H \cdot r(V_{post}) \cdot (V_{post} - E_H), \quad \frac{dr}{dt} = \frac{r_{\infty} - r}{\tau_H},$$

834 where  $r$  is the gating variable of H current,  $r_{\infty}$  is the steady-state activation, given by a  
835 sigmoidal function  $r_{\infty} = \frac{1}{1 + e^{\frac{V - V_{1/2}}{S_r}}}$  (Figure 1B, black curve),  $\tau_r$  is the voltage-dependent

$$836 \text{ time constant given by } \tau_H = \frac{\tau_{H0}}{1 + e^{\frac{V - V_{\tau_r}}{S_{\tau_r}}}}.$$

837 In a subset of experiments we simulated inward neuromodulatory current ( $I_{MI}$ ) via  
838 dynamic clamp (Swensen and Marder, 2001):

$$839 \quad I_{MI} = g_{MI} \cdot m \cdot (V_{post} - E_{MI}), \quad \frac{dm}{dt} = \frac{m_{\infty} - m}{\tau_m},$$

840 where  $m$  is the gating variable of neuromodulatory current,  $m_{\infty}$  is the steady-state  
841 activation, given by a sigmoidal function  $m_{\infty} = \frac{1}{1 + e^{\frac{V - V_{MI_{1/2}}}{S_{MI}}}}$ .

842 Parameter values of the currents injected in both neuron were the same to  
843 preserve the symmetry and are given in Table 1. Since the artificial currents injected  
844 into both neurons had the same parameter values, in order to create stable half-center  
845 oscillators, neurons used to comprised the oscillator had to have similar resting  
846 membrane potentials and intrinsic excitability. Thus, in the sunset of experiments, when  
847 two GM neurons had very different resting membrane potentials at baseline, the  
848 membrane potential were brought to the same range of  $\pm 5 \text{ mV}$  by either injecting a  
849 small amount of positive constant current or negative leak current to a more  
850 hyperpolarized cell.

851 **Table 1. Parameter values for the dynamic clamp**

| Parameter                                                            | Value                      | Description                                     |
|----------------------------------------------------------------------|----------------------------|-------------------------------------------------|
| <b>Synaptic current (<math>I_{syn}</math>)</b>                       |                            |                                                 |
| $g_{syn}$                                                            | Varied from 150 to 1050 nS | Maximal conductance of synaptic current         |
| $E_{syn}$                                                            | -80 mV                     | Reversal potential of synaptic current          |
| $V_{th}$                                                             | Varied from -28 to -54 mV  | Synaptic threshold voltage                      |
| $\tau_{syn}$                                                         | 50 or 100 msec             | Synaptic time constant                          |
| $V_{slope}$                                                          | -2 mV                      | Slope factor of synaptic activation function    |
| <b>Hyperpolarization-activated inward current (<math>I_H</math>)</b> |                            |                                                 |
| $g_H$                                                                | Varied from 150 to 1050 nS | Maximal conductance of H current                |
| $E_H$                                                                | -10 mV                     | Reversal potential of H current                 |
| $V_{1/2}$                                                            | -50 mV                     | Half-maximal activation voltage of H current    |
| $s_r$                                                                | 7 mV                       | Slope factor of H current activation function   |
| $\tau_{H0}$                                                          | 2000 or 3000 msec          | Time constant of H current                      |
| $V_{\tau_r}$                                                         | -110 mV                    | Half-maximal voltage of H current time constant |
| $s_{\tau_r}$                                                         | -13 mV                     | Slope factor of H current time constant         |
| <b>Neuromodulatory inward current (<math>I_{MI}</math>)</b>          |                            |                                                 |
| $g_{MI}$                                                             | 100, 150 or 200 nS         | Maximal conductance of neuromodulatory current  |
| $E_{MI}$                                                             | -20 mV                     | Reversal potential of neuromodulatory current   |
| $V_{MI,1/2}$                                                         | -21 mV                     | Half-maximal activation voltage of $I_{MI}$     |
| $\tau_m$                                                             | 4 msec                     | Time constant of neuromodulatory current        |
| $s_{MI}$                                                             | -8 mV                      | Slope factor of $I_{MI}$ activation function    |

852 **Temperature experiments**

853 Temperature of the superfusing saline was controlled using either a waveform  
854 generator (RIGOL, DG1022 series) or Arduino connected to a temperature controller  
855 (model CL-100, Warner Instruments) and altered during each experiment using a Peltier  
856 device and thermocouple (SC-20 and TA-29, Warner Instruments). We performed three  
857 types of temperature experiments. In the first set of experiments temperature was  
858 changed in one big step from 10°C to 20°C in 1 minute, held at 20°C for 2-10 min and  
859 brought back to 10°C in one step (N=13). In the second set of temperature experiments,  
860 waveform generator or Arduino were programmed to change temperature from 10°C to  
861 20°C in 2°C/minute steps (N=5). Each temperature step was held for 6 min during which  
862 synaptic threshold was changed via RTX1 from -50 mV to -30 mV in 5 mV/min steps to  
863 explore the effect of temperature on half-center oscillator circuit with different oscillatory  
864 mechanisms. In the final set of temperature experiments, waveform generator or  
865 Arduino was programmed to generate a smooth temperature ramp from 10°C to 20°C

866 over 10 to 20 minutes (N=22). Temperature was then held for 2-5 minutes at 20°C and  
867 gradually brought back to 10°C in a symmetric ramp. For a subset of temperature  
868 experiments (N=15) inward neuromodulatory current  $I_{MI}$  was simulated via dynamic  
869 clamp in both GM neurons at either 10°C, 20°C or both temperatures.

870 Temperature dependence of the conductances and time constants of the  
871 currents generated with the dynamic clamp was implemented in the following way:

872 
$$g_{syn} = g_{syn0} \cdot Q_{10}^{\frac{T-T_0}{10}}, g_H = g_{H0} \cdot Q_{10}^{\frac{T-T_0}{10}}, \tau_{syn} = \frac{\tau_{syn0}}{Q_{10}^{\frac{T-T_0}{10}}}, \tau_H = \frac{\tau_{H0}}{Q_{10}^{\frac{T-T_0}{10}}}$$
, where  $T$  is the saline

873 temperature and  $T_0 = 10^\circ\text{C}$  is a reference temperature.  $Q_{10}$ , a metric describing the rate  
874 of change of a biological process due to increase in temperature by 10°C, was set to  
875 either 1 or 2, according to experimentally measured  $Q_{10}$ s in STG neurons (Tang et al.,  
876 2010).

## 877 **QUANTIFICATION AND STATISTICAL ANALYSIS**

### 878 *Spike detection*

879 Spikes were detected using local maxima detection algorithm in MATLAB, using  
880 a threshold of -40 mV and a peak prominence (height of the peak above the reference  
881 level) of 3. Prior to running local maxima algorithm voltage traces were smoothed using  
882 moving average filter with 10 data points for calculating smoothed value to reduce the  
883 noise in the traces.

### 884 *Burst detection*

885 For an accurate detection of the bursts we used two methods: based on the spiking  
886 activity and based on the slow wave, as in most cases circuits exhibited prominent slow  
887 wave during alternating bursting.

### 888 *Burst detection based on the spiking activity*

889 Bursts were identified as discrete events consisting of a sequence of spikes with  
890 burst onset defined by two consecutive spikes within an interval less than mean  
891 interspike interval ( $\overline{ISI}$ ) in a trace with set parameters, and burst termination defined by  
892 an  $ISI$  greater than  $\overline{ISI} + 500 \text{ msec}$ . Duty cycle ( $DC$ ) was calculated as the burst  
893 duration divided by the cycle period (Figure 2B). Spike frequency was calculated as  
894 mean frequency of spikes within bursts.

895 *Burst detection based on the slow wave*

896 Traces were low pass filtered to 1 Hz and smoothed using moving average filter  
897 with 100 data points windows. Then slow-wave peaks of membrane potential  
898 oscillations were detected using local maxima detection algorithm, with a threshold of  
899 mean value of filtered membrane potential ( $\overline{V_M}$ ) + 2.5 mV and a peak prominence of 3.  
900 Slow-wave dips were detected using the same algorithm for the inverted filtered traces.  
901 Slow-wave amplitude of membrane potential oscillation were calculated as the  
902 difference between peak and dip values. Cycle frequency of bursting circuits was  
903 calculated as an inverse of oscillation period determined by thresholding the filtered  
904 traces. Threshold was set to half the amplitude of the slow wave.

905 We manually inspected the traces to ensure the accuracy of bursts and spikes  
906 identification.

907 *Classification of a circuit activity pattern*

908 Similar to Grashow et al. (2009), we classified the activity patterns of reciprocally  
909 inhibitory circuits into silent, asymmetric, irregular spiking and antiphase bursting (or  
910 half-center oscillations). To refine classification, we also added a 5<sup>th</sup> category, antiphase  
911 spiking (Figure S1 A).

912 Activity pattern was classified as silent if both neurons fired less than 5 spikes in  
913 1 minute. If only one of the cells fired more than 5 spikes in 1 minute, the activity pattern  
914 was classified as asymmetric. If both cells were spiking, the pattern was classified as  
915 either irregular spiking, antiphase spiking or bursting. To distinguish these activity  
916 patterns, we calculated a measurement of burst exclusion,  $\chi_{network}$ , described in  
917 Grashow et al. (2009). This measure ranges from -1 (simultaneous bursts) to +1  
918 (alternating bursts).

919 We determined active time intervals for each cell: if the neurons were bursting,  
920 the active time intervals were defined as the time from the first to the last spike in the  
921 burst, otherwise the active time intervals were defined as  $\frac{1}{4}$  the average interspike  
922 interval and centered on each spike. We then calculated the total active time for each  
923 cell,  $t_{cell1}$  and  $t_{cell2}$  as a sum of the active times of each respective cell, and the overlap  
924 time (when both cells were active) for the circuit,  $O_{network}$ . We then compared  $O_{network}$

925 to the overlap times that would be expected for uncorrelated circuits,  $O_{random}$ , and the  
926 minimum possible overlap time,  $O_{min}$ .

$$927 \quad O_{min} = \begin{cases} T_{trial} - t_{cell1} - t_{cell2} & \text{if } t_{cell1} + t_{cell2} > T_{trial} \\ 0 & \text{otherwise} \end{cases}$$

$$928 \quad O_{random} = \begin{cases} \min(t_{cell1}, t_{cell2}) - \frac{1}{2} [T_{trial} - \max(t_{cell1}, t_{cell2})] & \text{if } t_{cell1} + t_{cell2} > T_{trial} \\ \frac{\min(t_{cell1}, t_{cell2})^2}{2[T_{trial} - \max(t_{cell1}, t_{cell2})]} & \text{otherwise} \end{cases}$$

929  $T_{trial}$  is the total active time of the network, calculated as  $T_{trial} = t_{cell1} + t_{cell2} -$   
930  $O_{network}$ .

931 From this we calculated the exclusion factor  $\chi_{network}$  as

$$932 \quad \chi_{network} = \frac{O_{random} - O_{network}}{O_{random} - O_{min}}$$

933 Circuits with both active cells were categorized as antiphase bursters (or half-center  
934 oscillators) if  $\chi_{network} \geq 0.1$  and were characterized as spiking otherwise.

935 Finally, to determine whether the network exhibited antiphase spiking pattern of  
936 activity, we calculated percent of single spikes in bursts. If the percent of single spikes  
937 in bursts was more than 80%, we characterized the activity pattern of these circuits as  
938 antiphase spiking.

### 939 Spectral Analysis (Figures 5, 6, S2)

940 Spectrograms for the temperature experiments were calculated using the Burg  
941 (1967) method for estimation of the power spectral density in each time window. The  
942 Burg method fits the autoregressive (AR) model of a specified order  $p$  in the time series  
943 by minimizing the sum of squares of the residuals. The fast-Fourier transform (FFT)  
944 spectrum is estimated using the previously calculated AR coefficients. This method is  
945 characterized by higher resolution in the frequency domain than traditional FFT spectral  
946 analysis, especially for a relatively short time window (Buttkus, 2000). We used the  
947 following parameters for the spectral estimation: data window of 3.2 s, 50% overlap to  
948 calculate the spectrogram, and number of estimated AR coefficients  $p = (\text{window}/4) +$   
949 1. Before calculating power spectrum, voltage traces were low-pass filtered at 2 Hz  
950 using a six-order Butterworth filter and down-sampled.

951 Statistics

952 To determine whether the duty cycle and spike frequency significantly  
953 increased/decreased with ERQ respectively, we measured the Spearman rank  
954 correlation coefficient ( $\rho$ ) between the mean values of these characteristic and ERQ  
955 (Figure 2D). The Spearman correlation coefficient measures the strength and direction  
956 of correlation between two variables.  $\rho = 1$  indicates that the two variables are a perfect  
957 monotone function of each other.

958 To determine the  $g_H$ - $g_{Syn}$  conductances sets that produce statistically similar  
959 characteristics of the output of half-centers with escape and release mechanisms we  
960 performed Wilcoxon rank-sum test for each set of  $g_H$ - $g_{Syn}$  conductances (Figure 3B-F).  
961 Significance level was set to 0.05. The conductances sets producing the circuit output  
962 characteristics that were not significantly different ( $p > 0.05$ ) are indicated by the red  
963 boxes in Figure 3.

964 To determine whether the GM neurons resting membrane potentials, spike  
965 amplitudes and input resistances were significantly different at 10°C and 20°C we  
966 performed paired-sample Wilcoxon signed rank-sum test (Figure 5C,D). The results of  
967 the statistical test can be found in the legend of Figure 5.

968 To determine whether the characteristics of the output of half-centers with  
969 different oscillatory mechanisms and  $Q_{10}$ s were significantly different between 10°C and  
970 20°C we performed paired-sample Wilcoxon signed rank-sum test (Figure 6F).  
971 Significance level was set to 0.05. The results of the statistical test can be found in  
972 Table S2. To determine whether the changes in characteristics with an increase in  
973 temperature were significantly different between the circuits with release and escape  
974 mechanisms and different temperature-dependences we performed one-way ANOVA  
975 with Tuckey post-hoc using IBM SPSS Statistics 24. The results of one-way ANOVA  
976 can be found in Tables S3-8.

977 To determine whether the characteristics of the circuit output were significantly  
978 different after the addition of the neuromodulatory current we performed paired-sample  
979 t-test (Figure 8D1-5). Significance level was set to 0.05. The results of the statistical test  
980 can be found in the legend of Figure 8.



981 **References**

- 982 Alonso, L.M., and Marder, E. (2020). Temperature compensation in a small rhythmic circuit.  
983 *Elife* *9*, e55470.
- 984 Amendola, J., Woodhouse, A., Martin-Eauclaire, M.F., and Goaillard, J.M. (2012). Ca<sup>2+</sup>/cAMP-  
985 sensitive covariation of I<sub>A</sub> and I<sub>H</sub> voltage dependences tunes rebound firing in  
986 dopaminergic neurons. *J Neurosci* *32*, 2166-2181.
- 987 Angstadt, J.D., and Calabrese, R.L. (1989). A hyperpolarization-activated inward current in  
988 heart interneurons of the medicinal leech. *J Neurosci* *9*, 2846-2857.
- 989 Angstadt, J.D., and Calabrese, R.L. (1991). Calcium currents and graded synaptic transmission  
990 between heart Interneurons of the leech. *J Neurosci* *11*, 746-759.
- 991 Arbas, E.A., and Calabrese, R.L. (1987a). Ionic conductances underlying the activity of  
992 interneurons that control heartbeat in the medicinal leech. *J Neurosci* *7*, 3945-3952.
- 993 Arbas, E.A., and Calabrese, R.L. (1987b). Slow oscillations of membrane potential in  
994 interneurons that control heartbeat in the medicinal leech. *J Neurosci* *7*, 3953-3960.
- 995 Bartos, M., Manor, Y., Nadim, F., Marder, E., and Nusbaum, M.P. (1999). Coordination of fast  
996 and slow rhythmic neuronal circuits. *J Neurosci* *19*, 6650-6660.
- 997 Blitz, D.M., and Nusbaum, M.P. (2011). Neural circuit flexibility in a small sensorimotor  
998 system. *Curr Opin Neurobiol* *21*, 544-552.
- 999 Brown, T.G. (1911). The intrinsic factors in the act of progression in the mammal. *Proc R Soc*  
1000 *Lond Biol* *84*, 308-319.
- 1001 Buchholtz, F., Golowasch, J., Epstein, I.R., and Marder, E. (1992). Mathematical model of an  
1002 identified stomatogastric ganglion neuron. *J Neurophysiol* *67*, 332-340.
- 1003 Burg, J.P. (1967). Maximum entropy spectral analysis. Paper presented at: Proc 37th Meeting  
1004 Society of Exploration Geophysicist (Oklahoma City, OK).
- 1005 Buttkus, B. (2000). *Spectral Analysis and Filter Theory* (Berlin: Springer).
- 1006 Calabrese, R.L. (1998). Cellular, synaptic, network, and modulatory mechanisms involved in  
1007 rhythm generation. *Curr Opin Neurobiol* *8*, 710-717.
- 1008 Calabrese, R.L., Norris, B.J., and Wenning, A. (2016). The neural control of heartbeat in  
1009 invertebrates. *Curr Opin Neurobiol* *41*, 68-77.
- 1010 Calabrese, R.L., Norris, B.J., Wenning, A., and Wright, T.M. (2011). Coping with variability in  
1011 small neuronal networks. *Integrative and comparative biology* *51*, 845-855.
- 1012 Caplan, J.S., Williams, A.H., and Marder, E. (2014). Many parameter sets in a  
1013 multicompartment model oscillator are robust to temperature perturbations. *J*  
1014 *Neurosci* *34*, 4963-4975.
- 1015 Daun, S., Rubin, J.E., and Rybak, I.A. (2009). Control of oscillation periods and phase  
1016 durations in half-center central pattern generators: a comparative mechanistic  
1017 analysis. *J Comput Neurosci* *27*, 3-36.
- 1018 Doloc-Mihu, A., and Calabrese, R.L. (2014). Identifying crucial parameter correlations  
1019 maintaining bursting activity. *PLoS computational biology* *10*, e1003678.
- 1020 Getting, P.A. (1989). Emerging principles governing the operation of neural networks. *Annu*  
1021 *Rev Neurosci* *12*, 185-204.
- 1022 Goaillard, J.M., and Marder, E. (2021). Ion Channel Degeneracy, Variability, and Covariation  
1023 in Neuron and Circuit Resilience. *Annu Rev Neurosci*.
- 1024 Goaillard, J.M., Taylor, A.L., Schulz, D.J., and Marder, E. (2009). Functional consequences of  
1025 animal-to-animal variation in circuit parameters. *Nat Neurosci* *12*, 1424-1430.
- 1026 Goldman, M.S., Golowasch, J., Marder, E., and Abbott, L.F. (2001). Global structure,  
1027 robustness, and modulation of neuronal models. *J Neurosci* *21*, 5229-5238.

- 1028 Grashow, R., Brookings, T., and Marder, E. (2009). Reliable neuromodulation from circuits  
1029 with variable underlying structure. *Proc Natl Acad Sci U S A* *106*, 11742-11746.
- 1030 Gutierrez, G.J., and Grashow, R.G. (2009). *Cancer borealis* stomatogastric nervous system  
1031 dissection. In *J Vis Exp*.
- 1032 Haddad, S.A., and Marder, E. (2018). Circuit Robustness to Temperature Perturbation Is  
1033 Altered by Neuromodulators. *Neuron* *100*, 609-623.
- 1034 Hill, A.A., Lu, J., Masino, M.A., Olsen, O.H., and Calabrese, R.L. (2001). A model of a segmental  
1035 oscillator in the leech heartbeat neuronal network. *J Comput Neurosci* *10*, 281-302.
- 1036 Katz, P.S. (2016). Evolution of central pattern generators and rhythmic behaviours. *Philos*  
1037 *Trans R Soc Lond B Biol Sci* *371*, 20150057.
- 1038 Khorkova, O., and Golowasch, J. (2007). Neuromodulators, not activity, control coordinated  
1039 expression of ionic currents. *J Neurosci* *27*, 8709-8718.
- 1040 Kirby, M.S., and Nusbaum, M.P. (2007). Peptide hormone modulation of a neuronally  
1041 modulated motor circuit. *J Neurophysiol* *98*, 3206-3220.
- 1042 Kushinsky, D., Morozova, E.O., and Marder, E. (2019). In vivo effects of temperature on the  
1043 heart and pyloric rhythms in the crab *Cancer borealis*. *J Exp Biol* *222*.
- 1044 Li, X., Bucher, D., and Nadim, F. (2018). Distinct Co-modulation rules of synapses and voltage-  
1045 gated currents coordinate interactions of multiple neuromodulators. *J Neurosci* *38*,  
1046 8549-8562.
- 1047 Marder, E., and Bucher, D. (2007). Understanding circuit dynamics using the stomatogastric  
1048 nervous system of lobsters and crabs. *Annu Rev Physiol* *69*, 291-316.
- 1049 Marder, E., and Calabrese, R.L. (1996). Principles of rhythmic motor pattern generation.  
1050 *Physiol Rev* *76*, 687-717.
- 1051 Marder, E., and Eisen, J.S. (1984). Transmitter identification of pyloric neurons: electrically  
1052 coupled neurons use different transmitters. *J Neurophysiol* *51*, 1345-1361.
- 1053 Marder, E., and Goaillard, J.M. (2006). Variability, compensation and homeostasis in neuron  
1054 and network function. *Nat Rev Neurosci* *7*, 563-574.
- 1055 Nadim, F., Olsen, Ø.H., De Schutter, E., and Calabrese, R.L. (1995). Modeling the leech  
1056 heartbeat elemental oscillator. I. Interactions of intrinsic and synaptic currents. *J*  
1057 *Comput Neurosci* *2*, 215-235.
- 1058 O'Leary, T., and Marder, E. (2016). Temperature-robust neural function from activity-  
1059 dependent ion channel regulation. *Current Biology* *26*, 2935-2941.
- 1060 Olypher, A.V., and Calabrese, R.L. (2007). Using constraints on neuronal activity to reveal  
1061 compensatory changes in neuronal parameters. *J Neurophysiol* *98*, 3749-3758.
- 1062 Onasch, S., and Gjorgjieva, J. (2020). Circuit Stability to Perturbations Reveals Hidden  
1063 Variability in the Balance of Intrinsic and Synaptic Conductances. *J Neurosci* *40*, 3186-  
1064 3202.
- 1065 Patel, Y.A., George, A., Dorval, A.D., White, J.A., Christini, D.J., and Butera, R.J. (2017). Hard  
1066 real-time closed-loop electrophysiology with the Real-Time eXperiment Interface  
1067 (RTXI). *PLoS Comput Biol* *13*, e1005430.
- 1068 Perkel, D.H., and Mulloney, B. (1974). Motor pattern production in reciprocally inhibitory  
1069 neurons exhibiting postinhibitory rebound. *Science* *185*, 181-183.
- 1070 Powell, D., Haddad, S.A., Gorur-Shandilya, S., and Marder, E. (2021a). Coupling between fast  
1071 and slow oscillator circuits in *Cancer borealis* is temperature-compensated. *Elife* *10*,  
1072 e60454
- 1073 Powell, D.J., Marder, E., and Nusbaum, M.P. (2021b). Perturbation-specific responses by two  
1074 neural circuits generating similar activity patterns. *Curr Biol* *31*, 1-8.

- 1075 Prinz, A.A., Billimoria, C.P., and Marder, E. (2003). Alternative to hand-tuning conductance-  
1076 based models: construction and analysis of databases of model neurons. *J*  
1077 *Neurophysiol* *90*, 3998-4015.
- 1078 Prinz, A.A., Bucher, D., and Marder, E. (2004). Similar network activity from disparate circuit  
1079 parameters. *Nat Neurosci* *7*, 1345-1352.
- 1080 Rinberg, A., Taylor, A.L., and Marder, E. (2013). The effects of temperature on the stability of  
1081 a neuronal oscillator. *PLoS Comput Biol* *9*, e1002857.
- 1082 Roffman, R.C., Norris, B.J., and Calabrese, R.L. (2012). Animal-to-animal variability of  
1083 connection strength in the leech heartbeat central pattern generator. *J Neurophysiol*  
1084 *107*, 1681-1693.
- 1085 Sakurai, A., and Katz, P.S. (2016). The central pattern generator underlying swimming in  
1086 *Dendronotus iris*: a simple half-center network oscillator with a twist. *J Neurophysiol*  
1087 *116*, 1728-1742.
- 1088 Satterlie, R.A. (1985). Reciprocal inhibition and postinhibitory rebound produce  
1089 reverberation in a locomotor pattern generator. *Science* *229*, 402-404.
- 1090 Schulz, D.J., Goaillard, J.M., and Marder, E. (2006). Variable channel expression in identified  
1091 single and electrically coupled neurons in different animals. *Nat Neurosci* *9*, 356 -  
1092 362.
- 1093 Schulz, D.J., Goaillard, J.M., and Marder, E.E. (2007). Quantitative expression profiling of  
1094 identified neurons reveals cell-specific constraints on highly variable levels of gene  
1095 expression. *Proc Natl Acad Sci U S A* *104*, 13187-13191.
- 1096 Sharp, A.A., Skinner, F.K., and Marder, E. (1996). Mechanisms of oscillation in dynamic clamp  
1097 constructed two-cell half-center circuits. *J Neurophysiol* *76*, 867-883.
- 1098 Skinner, F.K., Kopell, N., and Marder, E. (1994). Mechanisms for oscillation and frequency  
1099 control in reciprocal inhibitory model neural networks. *J Comput Neurosci* *1*, 69-87.
- 1100 Soffe, S.R., Zhao, F.Y., and Roberts, A. (2001). Functional projection distances of spinal  
1101 interneurons mediating reciprocal inhibition during swimming in *Xenopus* tadpoles.  
1102 *Eur J Neurosci* *13*, 617-627.
- 1103 Soofi, W., Goeritz, M.L., Kispersky, T.J., Prinz, A.A., Marder, E., and Stein, W. (2014). Phase  
1104 maintenance in a rhythmic motor pattern during temperature changes *in vivo*. *J*  
1105 *Neurophysiol* *111*, 2603-2613.
- 1106 Soofi, W., and Prinz, A.A. (2015). Differential effects of conductances on the phase resetting  
1107 curve of a bursting neuronal oscillator. *Journal of Computational Neuroscience* *38*,  
1108 539-558.
- 1109 Srikanth, S., and Narayanan, R. (2015). Variability in State-Dependent Plasticity of Intrinsic  
1110 Properties during Cell-Autonomous Self-Regulation of Calcium Homeostasis in  
1111 Hippocampal Model Neurons. *eNeuro* *2*.
- 1112 Stadele, C., Heigele, S., and Stein, W. (2015). Neuromodulation to the rescue: compensation  
1113 of temperature-induced breakdown of rhythmic motor patterns via extrinsic  
1114 neuromodulatory input. *PLoS Biol* *13*, e1002265.
- 1115 Swensen, A.M., and Bean, B.P. (2005). Robustness of burst firing in dissociated purkinje  
1116 neurons with acute or long-term reductions in sodium conductance. *J Neurosci* *25*,  
1117 3509-3520.
- 1118 Swensen, A.M., and Marder, E. (2000). Multiple peptides converge to activate the same  
1119 voltage-dependent current in a central pattern-generating circuit. *J Neurosci* *20*,  
1120 6752-6759.
- 1121 Swensen, A.M., and Marder, E. (2001). Modulators with convergent cellular actions elicit  
1122 distinct circuit outputs. *J Neurosci* *21*, 4050-4058.

- 1123 Tang, L.S., Goeritz, M.L., Caplan, J.S., Taylor, A.L., Fisek, M., and Marder, E. (2010). Precise  
1124 temperature compensation of phase in a rhythmic motor pattern. *PLoS Biol* 8,  
1125 e1000469.
- 1126 Tang, L.S., Taylor, A.L., Rinberg, A., and Marder, E. (2012). Robustness of a rhythmic circuit to  
1127 short- and long-term temperature changes. *J Neurosci* 32, 10075-10085.
- 1128 Temporal, S., Desai, M., Khorkova, O., Varghese, G., Dai, A., Schulz, D.J., and Golowasch, J.  
1129 (2012). Neuromodulation independently determines correlated channel expression  
1130 and conductance levels in motor neurons of the stomatogastric ganglion. *J*  
1131 *Neurophysiol* 107, 718-727.
- 1132 Tobin, A.E., Cruz-Bermudez, N.D., Marder, E., and Schulz, D.J. (2009). Correlations in ion  
1133 channel mRNA in rhythmically active neurons. *PLoS ONE* 4, e6742.
- 1134 Tran, T., Unal, C.T., Severin, D., Zaborszky, L., Rotstein, H.G., Kirkwood, A., and Golowasch, J.  
1135 (2019). Ionic current correlations are ubiquitous across phyla. *Sci Rep* 9, 1687.
- 1136 Wang, X.-J., and Rinzel, J. (1992). Alternating and synchronous rhythms in reciprocally  
1137 inhibitory model neurons. *Neural Comp* 4, 84-97.
- 1138 Xu, H., and Robertson, M.R. (1994). Effects of temperature on properties of flight neurons in  
1139 the locust. *J Comp Physiol [A]* 174, 193-202.
- 1140 Xu, H., and Robertson, R.M. (1996). Neural parameters contributing to temperature  
1141 compensation in the flight CPG of the locust, *Locusta migratoria*. *Brain Res* 734, 213-  
1142 222.
- 1143 Zang, Y., Hong, S., and De Schutter, E. (2020). Firing rate-dependent phase responses of  
1144 Purkinje cells support transient oscillations. *eLife* 9.
- 1145 Zhang, C., and Lewis, T.J. (2013). Phase response properties of half-center oscillators. *J*  
1146 *Comput Neurosci* 35, 55-74.
- 1147 Zhao, S., and Golowasch, J. (2012). Ionic current correlations underlie the global tuning of  
1148 large numbers of neuronal activity attributes. *J Neurosci* 32, 13380-13388.
- 1149

Supplementary Tables. Summary statistics for figure 7.

Table S1

|                | Escape       |                                 |              |              |                                 |              | Release      |                                 |              |              |                                 |              |
|----------------|--------------|---------------------------------|--------------|--------------|---------------------------------|--------------|--------------|---------------------------------|--------------|--------------|---------------------------------|--------------|
|                | 10°C         |                                 |              | 20°C         |                                 |              | 10°C         |                                 |              | 20°C         |                                 |              |
|                | $Q_{10} = 1$ | $Q_{10} = 2$ for $g_H, g_{Syn}$ | $Q_{10} = 2$ | $Q_{10} = 1$ | $Q_{10} = 2$ for $g_H, g_{Syn}$ | $Q_{10} = 2$ | $Q_{10} = 1$ | $Q_{10} = 2$ for $g_H, g_{Syn}$ | $Q_{10} = 2$ | $Q_{10} = 1$ | $Q_{10} = 2$ for $g_H, g_{Syn}$ | $Q_{10} = 2$ |
| Cycle freq, Hz | 0.23 ± 0.07  | 0.20 ± 0.09                     | 0.20 ± 0.07  | 0.23 ± 0.08  | 0.20 ± 0.09                     | 0.46 ± 0.19  | 0.19 ± 0.05  | 0.23 ± 0.09                     | 0.26 ± 0.11  | 0.28 ± 0.09  | 0.14 ± 0.06                     | 0.30 ± 0.11  |
| Spike freq, Hz | 7.9 ± 2.9    | 6.6 ± 2.1                       | 6.7 ± 1.1    | 10.1 ± 4.8   | 13.7 ± 4.3                      | 19.4 ± 2.0   | 7.7 ± 4.1    | 5.9 ± 2.8                       | 7.9 ± 1.8    | 9.1 ± 4.6    | 10.4 ± 3.7                      | 15.7 ± 3.1   |
| Amplitude, mV  | 22.7 ± 6.3   | 21.6 ± 1.0                      | 21.8 ± 2.4   | 21.5 ± 6.2   | 27.5 ± 4.4                      | 23.8 ± 4.4   | 27.9 ± 4.8   | 20.0 ± 7.3                      | 19.6 ± 5.3   | 20.6 ± 4.3   | 32.7 ± 10.3                     | 30.3 ± 10.3  |
| # spikes/burst | 9 ± 5        | 7 ± 1                           | 7 ± 2        | 13 ± 8       | 18 ± 5                          | 9 ± 4        | 18 ± 13      | 12 ± 9                          | 14 ± 6       | 15 ± 11      | 36 ± 23                         | 25 ± 7       |
| Duty cycle, %  | 25.8 ± 9.9   | 20.1 ± 5.2                      | 17.4 ± 0.4   | 26.7 ± 10.2  | 24.6 ± 5.5                      | 17.0 ± 1.6   | 42.0 ± 4.6   | 36.2 ± 10.6                     | 41.7 ± 4.4   | 40.0 ± 5.3   | 39.5 ± 6.2                      | 44.8 ± 2.9   |
| ERQ            | -0.08 ± 0.03 | -0.07 ± 0.02                    | -0.08 ± 0.02 | -0.07 ± 0.03 | -0.09 ± 0.03                    | -0.10 ± 0.02 | 0.13 ± 0.05  | 0.15 ± 0.07                     | 0.14 ± 0.07  | 0.14 ± 0.05  | 0.15 ± 0.07                     | 0.14 ± 0.08  |

Table S2

| Paired-samples Wilcoxon signed rank test for cycle frequency at 10°C vs 20°C |                      |    |         | Paired-samples Wilcoxon signed rank test for spike frequency at 10°C vs 20°C |                      |    |         |
|------------------------------------------------------------------------------|----------------------|----|---------|------------------------------------------------------------------------------|----------------------|----|---------|
| Mechanism                                                                    | $Q_{10}$             | N  | p-value | Mechanism                                                                    | $Q_{10}$             | N  | p-value |
| Escape                                                                       | 1                    | 11 | .100    | Escape                                                                       | 1                    | 21 | <.001   |
|                                                                              | 2 for $g_H, g_{Syn}$ | 4  | .144    |                                                                              | 2 for $g_H, g_{Syn}$ | 8  | .012    |
|                                                                              | 2                    | 3  | .109    |                                                                              | 2                    | 6  | .028    |
| Release                                                                      | 1                    | 6  | .028    | Release                                                                      | 1                    | 12 | .003    |
|                                                                              | 2 for $g_H, g_{Syn}$ | 5  | .043    |                                                                              | 2 for $g_H, g_{Syn}$ | 10 | .005    |
|                                                                              | 2                    | 4  | .144    |                                                                              | 2                    | 8  | .012    |

  

| Paired-samples Wilcoxon signed rank test for # spikes/burst at 10°C vs 20°C |                      |    |         | Paired-samples Wilcoxon signed rank test for amplitude at 10°C vs 20°C |                      |    |         |
|-----------------------------------------------------------------------------|----------------------|----|---------|------------------------------------------------------------------------|----------------------|----|---------|
| Mechanism                                                                   | $Q_{10}$             | N  | p-value | Mechanism                                                              | $Q_{10}$             | N  | p-value |
| Escape                                                                      | 1                    | 21 | <.001   | Escape                                                                 | 1                    | 21 | .011    |
|                                                                             | 2 for $g_H, g_{Syn}$ | 8  | 0.018   |                                                                        | 2 for $g_H, g_{Syn}$ | 8  | .012    |
|                                                                             | 2                    | 6  | .246    |                                                                        | 2                    | 6  | .075    |
| Release                                                                     | 1                    | 12 | .041    | Release                                                                | 1                    | 12 | .002    |
|                                                                             | 2 for $g_H, g_{Syn}$ | 10 | .005    |                                                                        | 2 for $g_H, g_{Syn}$ | 10 | .005    |
|                                                                             | 2                    | 8  | .018    |                                                                        | 2                    | 8  | .012    |

  

| Paired-samples Wilcoxon signed rank test for duty cycle at 10°C vs 20°C |                      |    |         | Paired-samples Wilcoxon signed rank test for ERQ at 10°C vs 20°C |                      |    |         |
|-------------------------------------------------------------------------|----------------------|----|---------|------------------------------------------------------------------|----------------------|----|---------|
| Mechanism                                                               | $Q_{10}$             | N  | p-value | Mechanism                                                        | $Q_{10}$             | N  | p-value |
| Escape                                                                  | 1                    | 21 | .590    | Escape                                                           | 1                    | 21 | .009    |
|                                                                         | 2 for $g_H, g_{Syn}$ | 8  | .123    |                                                                  | 2 for $g_H, g_{Syn}$ | 8  | .017    |
|                                                                         | 2                    | 6  | .753    |                                                                  | 2                    | 6  | .173    |
| Release                                                                 | 1                    | 12 | .388    | Release                                                          | 1                    | 12 | .136    |
|                                                                         | 2 for $g_H, g_{Syn}$ | 10 | .646    |                                                                  | 2 for $g_H, g_{Syn}$ | 10 | .286    |
|                                                                         | 2                    | 8  | .036    |                                                                  | 2                    | 8  | .575    |

Table S3

| Measure: change in cycle frequency from 10°C to 20°C;<br>Test: One-way ANOVA; F-statistic: F(5,59)=21.790,<br>p<0.001; Post-hoc: Tukey |                                               |        |                                               |       |         |                                               |       |
|----------------------------------------------------------------------------------------------------------------------------------------|-----------------------------------------------|--------|-----------------------------------------------|-------|---------|-----------------------------------------------|-------|
|                                                                                                                                        |                                               | Escape |                                               |       | Release |                                               |       |
|                                                                                                                                        | <i>Q</i> <sub>10</sub>                        | 1 all  | 2 for<br><i>g<sub>s</sub>,g<sub>Syn</sub></i> | 2 all | 1 all   | 2 for<br><i>g<sub>s</sub>,g<sub>Syn</sub></i> | 2 all |
| Escape                                                                                                                                 | 1 all                                         |        | .999                                          | <.001 | .014    | .053                                          | .540  |
|                                                                                                                                        | 2 for<br><i>g<sub>H</sub>,g<sub>Syn</sub></i> |        |                                               | <.001 | .147    | .101                                          | .864  |
|                                                                                                                                        | 2 all                                         |        |                                               |       | <.001   | <.001                                         | <.001 |
| Release                                                                                                                                | 1 all                                         |        |                                               |       |         | <.001                                         | .781  |
|                                                                                                                                        | 2 for<br><i>g<sub>H</sub>,g<sub>Syn</sub></i> |        |                                               |       |         |                                               | .006  |
|                                                                                                                                        | 2 all                                         |        |                                               |       |         |                                               |       |

Table S4

| Measure: change in spike frequency from 10°C to 20°C;<br>Test: One-way ANOVA; F-statistic: F(5,59)=9.897, p<0.001;<br>Post-hoc: Tukey |                                               |        |                                               |       |         |                                               |       |
|---------------------------------------------------------------------------------------------------------------------------------------|-----------------------------------------------|--------|-----------------------------------------------|-------|---------|-----------------------------------------------|-------|
|                                                                                                                                       |                                               | Escape |                                               |       | Release |                                               |       |
|                                                                                                                                       | <i>Q</i> <sub>10</sub>                        | 1 all  | 2 for<br><i>g<sub>s</sub>,g<sub>Syn</sub></i> | 2 all | 1 all   | 2 for<br><i>g<sub>s</sub>,g<sub>Syn</sub></i> | 2 all |
| Escape                                                                                                                                | 1 all                                         |        | .023                                          | <.001 | .981    | .580                                          | .006  |
|                                                                                                                                       | 2 for<br><i>g<sub>H</sub>,g<sub>Syn</sub></i> |        |                                               | .276  | .011    | .660                                          | .999  |
|                                                                                                                                       | 2 all                                         |        |                                               |       | <.001   | .007                                          | .483  |
| Release                                                                                                                               | 1 all                                         |        |                                               |       |         | .324                                          | .003  |
|                                                                                                                                       | 2 for<br><i>g<sub>H</sub>,g<sub>Syn</sub></i> |        |                                               |       |         |                                               | .397  |
|                                                                                                                                       | 2 all                                         |        |                                               |       |         |                                               |       |

Table S5

| Measure: change in # spikes/burst from 10°C to 20°C;<br>Test: One-way ANOVA; F-statistic: F(5,59)=13.949,<br>p<0.001; Post-hoc: Tukey |                                               |        |                                               |       |         |                                               |       |
|---------------------------------------------------------------------------------------------------------------------------------------|-----------------------------------------------|--------|-----------------------------------------------|-------|---------|-----------------------------------------------|-------|
|                                                                                                                                       |                                               | Escape |                                               |       | Release |                                               |       |
|                                                                                                                                       | <i>Q</i> <sub>10</sub>                        | 1 all  | 2 for<br><i>g<sub>s</sub>,g<sub>Syn</sub></i> | 2 all | 1 all   | 2 for<br><i>g<sub>s</sub>,g<sub>Syn</sub></i> | 2 all |
| Escape                                                                                                                                | 1 all                                         |        | .229                                          | .999  | .286    | <.001                                         | .279  |
|                                                                                                                                       | 2 for<br><i>g<sub>H</sub>,g<sub>Syn</sub></i> |        |                                               | .354  | .005    | .020                                          | 1.00  |
|                                                                                                                                       | 2 all                                         |        |                                               |       | .818    | <.001                                         | .391  |
| Release                                                                                                                               | 1 all                                         |        |                                               |       |         | <.001                                         | .007  |
|                                                                                                                                       | 2 for<br><i>g<sub>H</sub>,g<sub>Syn</sub></i> |        |                                               |       |         |                                               | .015  |
|                                                                                                                                       | 2 all                                         |        |                                               |       |         |                                               |       |

Table S6

| Measure: change in amplitude from 10°C to 20°C; Test:<br>One-way ANOVA; F-statistic: F(5,59)=50.437, p<0.001;<br>Post-hoc: Tukey |                                               |        |                                               |       |         |                                               |       |
|----------------------------------------------------------------------------------------------------------------------------------|-----------------------------------------------|--------|-----------------------------------------------|-------|---------|-----------------------------------------------|-------|
|                                                                                                                                  |                                               | Escape |                                               |       | Release |                                               |       |
|                                                                                                                                  | <i>Q</i> <sub>10</sub>                        | 1 all  | 2 for<br><i>g<sub>s</sub>,g<sub>Syn</sub></i> | 2 all | 1 all   | 2 for<br><i>g<sub>s</sub>,g<sub>Syn</sub></i> | 2 all |
| Escape                                                                                                                           | 1 all                                         |        | <.001                                         | .406  | <.001   | <.001                                         | <.001 |
|                                                                                                                                  | 2 for<br><i>g<sub>H</sub>,g<sub>Syn</sub></i> |        |                                               | .314  | <.001   | .002                                          | .082  |
|                                                                                                                                  | 2 all                                         |        |                                               |       | <.001   | <.001                                         | <.001 |
| Release                                                                                                                          | 1 all                                         |        |                                               |       |         | <.001                                         | <.001 |
|                                                                                                                                  | 2 for<br><i>g<sub>H</sub>,g<sub>Syn</sub></i> |        |                                               |       |         |                                               | .853  |
|                                                                                                                                  | 2 all                                         |        |                                               |       |         |                                               |       |

Table S7

| Measure: change in duty cycle from 10°C to 20°C; Test:<br>One-way ANOVA; F-statistic: F(5,59)= 0.964, p=0.447;<br>Post-hoc: Tukey |                                               |        |                                               |       |         |                                               |       |
|-----------------------------------------------------------------------------------------------------------------------------------|-----------------------------------------------|--------|-----------------------------------------------|-------|---------|-----------------------------------------------|-------|
|                                                                                                                                   |                                               | Escape |                                               |       | Release |                                               |       |
|                                                                                                                                   | <i>Q</i> <sub>10</sub>                        | 1 all  | 2 for<br><i>g<sub>s</sub>,g<sub>Syn</sub></i> | 2 all | 1 all   | 2 for<br><i>g<sub>s</sub>,g<sub>Syn</sub></i> | 2 all |
| Escape                                                                                                                            | 1 all                                         |        | .821                                          | 1.00  | .961    | .939                                          | .964  |
|                                                                                                                                   | 2 for<br><i>g<sub>H</sub>,g<sub>Syn</sub></i> |        |                                               | .865  | .489    | .999                                          | .999  |
|                                                                                                                                   | 2 all                                         |        |                                               |       | .999    | .948                                          | .964  |
| Release                                                                                                                           | 1 all                                         |        |                                               |       |         | .647                                          | .729  |
|                                                                                                                                   | 2 for<br><i>g<sub>H</sub>,g<sub>Syn</sub></i> |        |                                               |       |         |                                               | .000  |
|                                                                                                                                   | 2 all                                         |        |                                               |       |         |                                               |       |

Table S8

| Measure: change in ERQ from 10°C to 20°C; Test: One-<br>way ANOVA; F-statistic: F(5,59)=4.076, p=0.003; Post-hoc:<br>Tukey |                                               |        |                                               |       |         |                                               |       |
|----------------------------------------------------------------------------------------------------------------------------|-----------------------------------------------|--------|-----------------------------------------------|-------|---------|-----------------------------------------------|-------|
|                                                                                                                            |                                               | Escape |                                               |       | Release |                                               |       |
|                                                                                                                            | <i>Q</i> <sub>10</sub>                        | 1 all  | 2 for<br><i>g<sub>s</sub>,g<sub>Syn</sub></i> | 2 all | 1 all   | 2 for<br><i>g<sub>s</sub>,g<sub>Syn</sub></i> | 2 all |
| Escape                                                                                                                     | 1 all                                         |        | .019                                          | .033  | .970    | 1.00                                          | .549  |
|                                                                                                                            | 2 for<br><i>g<sub>H</sub>,g<sub>Syn</sub></i> |        |                                               | 1.00  | .177    | .040                                          | .757  |
|                                                                                                                            | 2 all                                         |        |                                               |       | .208    | .054                                          | .747  |
| Release                                                                                                                    | 1 all                                         |        |                                               |       |         | .963                                          | .942  |
|                                                                                                                            | 2 for<br><i>g<sub>H</sub>,g<sub>Syn</sub></i> |        |                                               |       |         |                                               | .592  |
|                                                                                                                            | 2 all                                         |        |                                               |       |         |                                               |       |
